# Supplementary material
Source: PubMed Central journal article supplement (PMC7044021)
Supplement: NIHMS1544087-supplement-1.pdf [file NIHMS1544087-supplement-1.pdf]

**Table S1.** Classification of diagnosis codes by custom diagnostic groups

| <b>Diagnosis group</b> | <b>Diagnosis</b>                                 |
|------------------------|--------------------------------------------------|
| abdominal.pain         | ABDOMINAL PAIN, GENERALIZED                      |
| abdominal.pain         | ABDOMINAL PAIN, UNSPECIFIED SITE                 |
| abdominal.pain         | ABDOMINAL PAIN, LEFT LOWER QUADRANT              |
| abdominal.pain         | ABDOMINAL PAIN RIGHT UPPER QUADRANT              |
| abdominal.pain         | ABDOMINAL PAIN RIGHT LOWER QUADRANT              |
| abdominal.pain         | ABDOMINAL PAIN OTHER SPECIFIED SITE              |
| accident.obs           | OBSERVATION FOLLOWING OTHER ACCIDENT             |
| accidental.fall        | OTHER ACCIDENTAL FALL FROM ONE LEVEL TO ANOTHER  |
| alcohol.hist           | PERSONAL HISTORY OF ALCOHOLISM                   |
| allergy                | UNSPECIFIED URTICARIA                            |
| allergy                | ALLERGIC RHINITIS CAUSE UNSPECIFIED              |
| allergy                | DERMATITIS DUE TO FOOD TAKEN INTERNALLY          |
| allergy                | ALLERGY UNSPECIFIED NOT ELSEWHERE CLASSIFIED     |
| allergy                | ANAPHYLACTIC REACTION DUE TO CRUSTACEANS         |
| allergy                | CHRONIC RHINITIS                                 |
| allergy                | OTHER ANAPHYLACTIC REACTION                      |
| allergy                | ALLERGIC RHINITIS DUE TO POLLEN                  |
| allergy                | OTHER SPECIFIED URTICARIA                        |
| allergy                | UNS ADVRS EFF UNS RX MEDICINAL&BIOLOGICAL SBSTNC |
| allergy                | DERMATITIS DUE DRUGS&MEDICINES TAKEN INTERNALLY  |
| allergy                | UNSPECIFIED PRURITIC DISORDER                    |
| allergy                | ALLERGIC URTICARIA                               |
| allergy                | CHOLINERGIC URTICARIA                            |
| allergy                | DERMATOGRAPHIC URTICARIA                         |
| allergy                | CHRONIC LARYNGITIS                               |
| allergy                | NEED FOR DESENSITIZATION TO ALLERGENS            |
| allergy                | ANGIONEUROTIC EDEMA NOT ELSEWHERE CLASSIFIED     |
| allergy                | UNSPECIFIED ADVERSE EFFECT OF INSULIN            |
| allergy                | UNS ADVRS EFF OTH RX MEDICINAL&BIOLOGICAL SBSTNC |
| allergy                | ANAPHYLACTIC REACTION DUE TO UNSPECIFIED FOOD    |
| allergy                | ALLERGIC RHINITIS DUE TO ANIMAL HAIR AND DANDER  |
| allergy                | ALLERGIC RHINITIS DUE TO OTHER ALLERGEN          |
| allergy                | OTHER DRUG ALLERGY                               |
| allergy                | URTICARIA DUE TO COLD AND HEAT                   |
| allergy                | IDIOPATHIC URTICARIA                             |
| allergy                | ADULT SEXUAL ABUSE NEC                           |
| allergy                | CERTAIN ADVERSE EFFECTS NEC OTHER                |
| anemia                 | UNSPECIFIED ANEMIA                               |
| anemia                 | UNSPECIFIED IRON DEFICIENCY ANEMIA               |
| anemia                 | HEREDITARY SPHEROCYTOSIS                         |

| Diagnosis group            | Diagnosis                                        |
|----------------------------|--------------------------------------------------|
| anemia                     | ACUTE POSTHEMORRHAGIC ANEMIA                     |
| anemia                     | HB-SS DISEASE WITH CRISIS                        |
| anemia                     | SICKLE-CELL DISEASE UNSPECIFIED                  |
| anemia                     | OTHER THALASSEMIA                                |
| anemia                     | SICKLE-CELL TRAIT                                |
| anemia                     | IRON DEFIC ANEMIA SEC DIET IRON INTAKE           |
| anxiety/bipolar/depression | BIPOLAR DISORDER UNSPECIFIED                     |
| anxiety/bipolar/depression | BIPLR I D/O MOST RECENT EPIS DPRSD FULL REMISS   |
| anxiety/bipolar/depression | BIPLR I D/O MOST RECENT EPIS MNIC PART/UNS REMIS |
| anxiety/bipolar/depression | BIPOLAR I D/O MOST RECENT EPIS DEPRESSED MOD     |
| anxiety/bipolar/depression | BIPOLAR I D/O MOST RECENT EPIS DEPRESSED MILD    |
| anxiety/bipolar/depression | BIPLR I MOST RECENT EPIS MNIC SEV W/PSYCHOT BHV  |
| anxiety/bipolar/depression | BIPOLAR I DISORDER MOST RECENT EPIS MIXED MILD   |
| anxiety/bipolar/depression | MAJOR DEPRESSIVE DISORDER SINGLE EPISODE UNSPEC  |
| anxiety/bipolar/depression | OTHER AND UNSPECIFIED BIPOLAR DISORDERS          |
| anxiety/bipolar/depression | ANXIETY STATE, UNSPECIFIED                       |
| anxiety/bipolar/depression | UNSPECIFIED ACUTE REACTION TO STRESS             |
| anxiety/bipolar/depression | DEPRESSIVE DISORDER NOT ELSEWHERE CLASSIFIED     |
| anxiety/bipolar/depression | MAJOR DPRSV DISORDER SINGLE EPIS FULL REMISSION  |
| anxiety/bipolar/depression | BIPLR I D/O MOST RECENT EPIS MIX FULL REMISSION  |
| anxiety/bipolar/depression | OTHER SPECIFIED EPISODIC MOOD DISORDER           |
| anxiety/bipolar/depression | UNSPECIFIED ADJUSTMENT REACTION                  |
| anxiety/bipolar/depression | ADJUSTMENT DISORDER WITH DEPRESSED MOOD          |
| anxiety/bipolar/depression | CHEST PAIN UNSPECIFIED                           |
| anxiety/bipolar/depression | PRECORDIAL PAIN                                  |
| anxiety/bipolar/depression | UNSPECIFIED EPISODIC MOOD DISORDER               |
| anxiety/bipolar/depression | GENERALIZED ANXIETY DISORDER                     |
| anxiety/bipolar/depression | BIPOLAR I DISORDER MOST RECENT EPIS MANIC UNSPEC |
| anxiety/bipolar/depression | DYSTHYMIC DISORDER                               |
| anxiety/bipolar/depression | MAJOR DEPRESSIVE DISORDER RECURRENT EPISODE MILD |
| anxiety/bipolar/depression | ADJ DISORDER WITH MIXED ANXIETY & DEPRESSED MOOD |
| anxiety/bipolar/depression | ADJUSTMENT DISORDER WITH ANXIETY                 |
| anxiety/bipolar/depression | SOCIAL PHOBIA                                    |
| anxiety/bipolar/depression | MAJOR DPRSV DISORDER RECURRENT EPISODE MODERATE  |
| anxiety/bipolar/depression | CONVERSION DISORDER                              |
| anxiety/bipolar/depression | PHOBIA, UNSPECIFIED                              |
| anxiety/bipolar/depression | NEURASTHENIA                                     |
| anxiety/bipolar/depression | POSTTRAUMATIC STRESS DISORDER                    |
| anxiety/bipolar/depression | MAJOR DPRSV DISORDER RECUR EPIS FULL REMISSION   |
| anxiety/bipolar/depression | MAJOR DPRSV DISORDER RECURRENT EPISODE UNSPEC    |
| anxiety/bipolar/depression | UNSPECIFIED PSYCHOSIS                            |
| anxiety/bipolar/depression | BIPOLAR I DISORDER MOST RECENT EPIS MANIC MILD   |

| <b>Diagnosis group</b>     | <b>Diagnosis</b>                                 |
|----------------------------|--------------------------------------------------|
| anxiety/bipolar/depression | UNSPECIFIED NONPSYCHOTIC MENTAL DISORDER         |
| anxiety/bipolar/depression | PREDOMINANT DISTURBANCE OF EMOTIONS              |
| anxiety/bipolar/depression | MAJ DPRSV D/O RECUR EPIS PART/UNSPEC REMISSION   |
| anxiety/bipolar/depression | ANXIETY DISORDER CONDITIONS CLASSIFIED ELSEWHERE |
| anxiety/bipolar/depression | PAINFUL RESPIRATION                              |
| anxiety/bipolar/depression | OBSESSIVE-COMPULSIVE DISORDERS                   |
| anxiety/bipolar/depression | BIPLR I D/O MOST RECENT EPIS MNIC FULL REMISSION |
| anxiety/bipolar/depression | BIPOLAR I DISORDER MOST RECENT EPIS MANIC MOD    |
| anxiety/bipolar/depression | IDENTITY DISORDER OF CHILDHOOD OR ADOLESCENCE    |
| anxiety/bipolar/depression | MAJOR DPRSV DISORDER SINGLE EPISODE MODERATE     |
| anxiety/bipolar/depression | SCHIZOAFFECTIVE DISORDER UNSPECIFIED             |
| anxiety/bipolar/depression | DISSOCIATIVE DISORDER OR REACTION UNSPECIFIED    |
| anxiety/bipolar/depression | ANXIETY STATES                                   |
| anxiety/bipolar/depression | BIPLR I D/O MOST RECENT EPIS MIX PART/UNS REMISS |
| anxiety/bipolar/depression | BIPOLAR I DISORDER SINGLE MANIC EPISODE MILD     |
| anxiety/bipolar/depression | OTHER ANXIETY STATES                             |
| anxiety/bipolar/depression | BIPOLAR I DISORDER MOST RECENT EPISODE UNSPEC    |
| anxiety/bipolar/depression | BIPOLAR I D/O MOST RECENT EPIS DEPRESSED UNS     |
| anxiety/bipolar/depression | BIPLR I MOST RECENT EPIS DPRSD PART/UNS REMISS   |
| anxiety/bipolar/depression | BIPOLAR I DISORDER MOST RECENT EPIS MIX MODERATE |
| anxiety/bipolar/depression | HYPERVENTILATION                                 |
| anxiety/bipolar/depression | RESPIRATORY MALFUNCTION ARISE FROM MENTAL FCT    |
| anxiety/bipolar/depression | OTHER ACUTE REACTIONS TO STRESS                  |
| anxiety/bipolar/depression | ADJUSTMENT DISORDER WITH DISTURBANCE OF CONDUCT  |
| anxiety/bipolar/depression | MAJOR DEPRESSIVE DISORDER SINGLE EPISODE MILD    |
| anxiety/bipolar/depression | OTHER DYSPNEA AND RESPIRATORY ABNORMALITIES      |
| anxiety/bipolar/depression | IMPULSE CONTROL DISORDER UNSPECIFIED             |
| anxiety/bipolar/depression | MAJ DPRSV D/O 1 EPIS SEV W/O MENTION PSYCHOT BHV |
| anxiety/bipolar/depression | MAJ DPRSV D/O SINGLE EPIS PART/UNSPEC REMISSION  |
| anxiety/bipolar/depression | PANIC DISORDER WITHOUT AGORAPHOBIA               |
| anxiety/bipolar/depression | OTHER ISOLATED OR SPECIFIC PHOBIAS               |
| anxiety/bipolar/depression | GI MALFUNCTION ARISE FROM MENTAL FCT             |
| anxiety/bipolar/depression | BIPOLAR I DISORDER MOST RECENT EPIS MIXED UNSPEC |
| anxiety/bipolar/depression | OTHER SPECIFIED PSYCHOPHYSIOLOGICAL MALFUNCTION  |
| anxiety/bipolar/depression | BIPLR I MOST RECENT EPIS DPRSD SEV W/PSYCHOT BHV |
| anxiety/bipolar/depression | BIPLR I MOST RECENT EPIS MIX SEV W/PSYCHOT BHV   |
| anxiety/bipolar/depression | OTHER AND UNSPECIFIED REACTIVE PSYCHOSIS         |
| anxiety/bipolar/depression | SWELLING, MASS, OR LUMP IN CHEST                 |
| anxiety/bipolar/depression | OTHER CHEST PAIN                                 |
| anxiety/bipolar/depression | HYPOCHONDRIASIS                                  |
| anxiety/bipolar/depression | MAJ DPRSV D/O RECUR EPIS SEV W/O PSYCHOT BHV     |
| anxiety/bipolar/depression | SHORTNESS OF BREATH                              |

| Diagnosis group            | Diagnosis                                        |
|----------------------------|--------------------------------------------------|
| anxiety/bipolar/depression | HEMOPTYSIS                                       |
| anxiety/bipolar/depression | PROLONGED DEPRESSIVE REACTION AS ADJ REACTION    |
| anxiety/bipolar/depression | UNDIFFERENTIATED SOMATOFORM DISORDER             |
| anxiety/bipolar/depression | CYCLOTHYMIC DISORDER                             |
| anxiety/bipolar/depression | MAJ DPRSV D/O RECUR EPIS SEV SPEC W/PSYCHOT BHV  |
| anxiety/bipolar/depression | SOMATIZATION DISORDER                            |
| anxiety/bipolar/depression | OTH SPEC PERVASIVE DVLPMNTL D/O CURR/ACTV STATE  |
| anxiety/bipolar/depression | MOOD DISORDER IN CONDITIONS CLASSIFIED ELSEWHERE |
| anxiety/bipolar/depression | BIPLR I MOST RECENT EPIS DPRS SEV NO PSYCHOT BHV |
| anxiety/bipolar/depression | ADJ DISORDER W/MIXED DISTURBANCE EMOTION&CONDUCT |
| anxiety/bipolar/depression | BIPOLAR I DISORDER SINGLE MANIC EPISODE MODERATE |
| anxiety/bipolar/depression | BIPOLAR I DISORDER SINGLE MANIC EPISODE UNSPEC   |
| anxiety/bipolar/depression | OTH ADJ REACT W/PREDOM DISTURBANCE OTH EMOTIONS  |
| anxiety/bipolar/depression | ABNORMAL CHEST SOUNDS                            |
| anxiety/bipolar/depression | MAJ DPRSV D/O 1 EPIS SEV SPEC AS W/PSYCHOT BHV   |
| anxiety/bipolar/depression | HICCOUGH                                         |
| anxiety/bipolar/depression | DELIRIUM DUE TO CONDITIONS CLASSIFIED ELSEWHERE  |
| asthma                     | ASTHMA, UNSPECIFIED, UNSPECIFIED STATUS          |
| asthma                     | COUGH VARIANT ASTHMA                             |
| asthma                     | EXTRINSIC ASTHMA, WITH EXACERBATION              |
| asthma                     | CHRONIC OBSTRUCTIVE ASTHMA WITH EXACERBATION     |
| asthma                     | INTRINSIC ASTHMA, WITH EXACERBATION              |
| asthma                     | EXERCISE INDUCED BRONCHOSPASM                    |
| asthma                     | EXTRINSIC ASTHMA, UNSPECIFIED                    |
| asthma                     | ASTHMA UNSPECIFIED WITH EXACERBATION             |
| asthma                     | INTRINSIC ASTHMA, UNSPECIFIED                    |
| blood.hhist                | FAMILY HISTORY OF OTHER BLOOD DISORDERS          |
| carr.bacterial             | OTHER SPECIFIED COUNSELING                       |
| carrier.bacterial          | CARR/SUSPECTED CARR OTH SPEC BACTERL DISEASES    |
| carrier.bacterial          | CARR/SPCT CARRIER METHICILLIN RSIST STAPH AUREUS |
| carrier.bacterial          | CARRIER OR SUSPECTED CARRIER OTHER STREPTOCOCCUS |
| check.up                   | ROUTINE GENERAL MEDICAL EXAM@HEALTH CARE FACL    |
| check.up                   | UNSPECIFIED EXAMINATION                          |
| check.up                   | OTH GENERAL MEDICAL EXAMINATION ADMIN PURPOSES   |
| check.up                   | OTHER SPECIFIED GENERAL MEDICAL EXAMINATION      |
| congenital                 | OTHER CONGENITAL ANOMALY OF TOES                 |
| congenital                 | UNSPECIFIED CONGENITAL ANOMALY OF HEART          |
| congenital                 | PRUNE BELLY SYNDROME                             |
| congenital                 | UNSPEC CONGN ANOMALY CERV VAGINA&EXT FE GENIT    |
| congenital                 | UNSPECIFIED CONGENITAL ANOMALY OF EAR            |
| congenital                 | UNSPECIFIED CONGENITAL ANOMALY OF GENITAL ORGANS |
| congenital                 | OTHER CONGENITAL ANOMALY OF UTERUS               |

| Diagnosis group | Diagnosis                                        |
|-----------------|--------------------------------------------------|
| congenital      | OTH CONGEN ANOMALY CERV VAGINA&EXTERNAL FE GENIT |
| congenital      | CONGENITAL DOUBLING OF UTERUS                    |
| congenital      | PECTUS EXCAVATUM                                 |
| congenital      | MARFANS SYNDROME                                 |
| congenital      | CONGENITAL ANOMALIES OF INTESTINAL FIXATION      |
| congenital      | MECKELS DIVERTICULUM                             |
| congenital      | CONGENITAL DEFORMITY OF KNEE                     |
| congenital      | OTHER SPECIFIED CONGENITAL CYSTIC KIDNEY DISEASE |
| congenital      | OTHER CONGENITAL ANOMALY OF TONGUE               |
| congenital      | OTHER PENILE ANOMALIES                           |
| congenital      | UNSPECIFIED CONGENITAL ANOMALY OF EYE            |
| congenital      | CONGENITAL BRANCHIAL CLEFT SINUS OR FISTULA      |
| congenital      | CONGENITAL ANOMALIES OF URACHUS                  |
| congenital      | CONGENITAL ANOMALIES OF FOOT NEC                 |
| congenital      | CONGENITAL MALPOSITION OF HEART AND CARDIAC APEX |
| congenital      | TONGUE TIE                                       |
| congenital      | CONGEN ANOMALY PERIPH VASC SYSTEM UNSPEC SITE    |
| congenital      | UNDESCENDED TESTIS                               |
| congenital      | PATENT DUCTUS ARTERIOSUS                         |
| congenital      | CONGENITAL ANOMALIES OF SKULL AND FACE BONES     |
| congenital      | CONGENITAL SPONDYLOLYSIS LUMBOSACRAL REGION      |
| congenital      | UNSPECIFIED CONGENITAL ANOMALY OF URINARY SYSTEM |
| congenital      | OTHER SPECIFIED CONGENITAL ANOMALIES OF MOUTH    |
| congenital      | OTHER SPECIFIED CONGENITAL ANOMALY OF SKIN       |
| congenital      | UNSPECIFIED CONGENITAL ANOMALY OF UPPER LIMB     |
| congenital      | CONGENITAL VASCULAR HAMARTOMAS                   |
| congenital      | CONGENITAL PES PLANUS                            |
| congenital      | UNSPECIFIED CONGENITAL CYSTIC KIDNEY DISEASE     |
| congenital      | CONGENITAL RENAL AGENESIS AND DYSGENESIS         |
| congenital      | OTHER CONGENITAL DEFORMITY OF HIP                |
| congenital      | OTHER SPEC MULTIPLE CONGENITAL ANOMALIES SO DESC |
| congenital      | CONGEN MUSCULOSKELETAL DEFORM SKULL FACE&JAW     |
| congenital      | ACCESSORY CARPAL BONES                           |
| congenital      | OTHER CONGENITAL ANOMALY GALLBLADDER BDS&LIVER   |
| congenital      | UNSPECIFIED CLEFT LIP                            |
| congenital      | OTHER ANOMALIES OF UTERUS                        |
| congenital      | CONGENITAL PREAURICULAR CYST                     |
| congenital      | CONGENITAL PREAURICULAR SINUS OR FISTULA         |
| congenital      | CONGENITAL ANOMALIES OF OTHER ENDOCRINE GLANDS   |
| congenital      | OTHER CONGENITAL ANOMALIES OF GREAT VEINS        |
| congenital      | CONGN ATRESIA&STENOS LG INTEST RECT&ANAL CANAL   |
| contact.disease | CONTACT/EXPOSURE TO OTHER COMMUNICABLE DISEASES  |

| Diagnosis group       | Diagnosis                                        |
|-----------------------|--------------------------------------------------|
| contact.disease       | CNTC W/OR EXPOSURE UNSPEC COMMUNICABLE DISEASE   |
| contact.meningococcus | CONTACT OR EXPOSURE TO MENINGOCOCCUS             |
| contact.viral         | CONTACT OR EXPOSURE TO OTHER VIRAL DISEASES      |
| contracepts           | OTH GENERAL CNSL&ADVICE CONTRACEPT MANAGEMENT    |
| contracepts           | GENERAL COUNSELING PRESCRIPTION ORAL CONTRACEPTS |
| contracepts           | ENCOUNTER EMERGENCY CONTRACEPT CNSL&PRESCRIPTION |
| contracepts           | GENERAL CNSL INITIATION OTH CONTRACEPT MEASURES  |
| contracepts           | SURVEILLANCE PREV PRESCRIBED CONTRACEPT PILL     |
| contracepts           | SURVEILLANCE PREV PRSC INTRAUTERN CNTRACPT DEVC  |
| contracepts           | ENCOUNTER INSERT/REMOVAL IU CONTRACEPTIVE DEVICE |
| contracepts           | SURVEILLANCE OTH PREV PRSC CONTRACEPT METHOD     |
| contracepts           | INSERTION OF IMPLANTABLE SUBDERMAL CONTRACEPTIVE |
| contracepts           | ENC FOR INSERTION INTRAUTERINE CONTRACEPT DEVICE |
| contracepts           | UNSPECIFIED CONTRACEPTIVE MANAGEMENT             |
| contracepts           | STERILIZATION                                    |
| contracepts           | ENCOUNTER FOR REMOVAL IU CONTRACEPT DEVICE       |
| contracepts           | SURVEILLANCE PREV PRSC IMPL SUBDERMAL CONTRACEPT |
| counseling            | BEREAVEMENT UNCOMPLICATED NEC                    |
| counseling            | COUNSELING NOS                                   |
| counseling            | OTHER PSYCHOLOGICAL OR PHYSICAL STRESS NEC OTHER |
| counseling            | EDUCATIONAL CIRCUMSTANCE                         |
| counseling            | COUNSELING FOR VICTIM OF CHILD ABUSE             |
| counseling            | OTHER SPECIFIED FAMILY CIRCUMSTANCE              |
| counseling            | COUNSELING FOR PARENT-CHILD PROBLEM UNSPECIFIED  |
| counseling            | SOCIAL MALADJUSTMENT                             |
| counseling            | INTERPERSONAL PROBLEM NOT ELSEWHERE CLASSIFIED   |
| dental.exam           | DENTAL EXAMINATION                               |
| dialysis              | RENAL DIALYSIS STATUS                            |
| diet.counseling       | DIETARY SURVEILLANCE AND COUNSELING              |
| diet.counseling       | PROBS RELATED INAPPROPRIATE DIET&EATING HABITS   |
| digestive.hhist       | FAMILY HISTORY OTHER DIGESTIVE DISORDERS         |
| ear                   | UNSPECIFIED HEARING LOSS                         |
| ear                   | IMPACTED CERUMEN                                 |
| eating.dis            | EATING DISORDER, UNSPECIFIED                     |
| eating.dis            | LOSS OF WEIGHT                                   |
| eating.dis            | UNDERWEIGHT                                      |
| eating.dis            | ANOREXIA NERVOSA                                 |
| eating.dis            | ANOREXIA                                         |
| eating.dis            | OTH PAIN DISORDER RELATED PSYCHOLOGICAL FACTORS  |
| eating.dis            | BULIMIA NERVOSA                                  |
| eating.dis            | OTHER AND UNSPECIFIED DISORDERS OF EATING        |
| eating.dis            | ABNORMAL WEIGHT GAIN                             |

| Diagnosis group   | Diagnosis                                        |
|-------------------|--------------------------------------------------|
| eating.dis        | TRANSIENT DISORDER INITIATING/MAINTAINING SLEEP  |
| eating.dis        | TOURETTE'S DISORDER                              |
| eating.dis        | POLYDIPSIA                                       |
| eating.dis        | OTHER DISORDER OF EATING                         |
| eating.dis        | SLEEP AROUSAL DISORDER                           |
| eating.dis        | PSYCHOGENIC PAIN, SITE UNSPECIFIED               |
| eating.dis        | POLYPHAGIA                                       |
| eating.dis        | CIRCADIAN RHYTHM SLEEP D/O NONORGANIC ORIGIN     |
| eggs.allergy      | PERSONAL HISTORY OF ALLERGY TO EGGS              |
| encephalitis.shot | NEED PROPH VACC ARTHROPOD-BORN VIRL ENCEPHALITIS |
| endocrine         | DIAB W/O COMP TYPE I [JUV] NOT STATED UNCCTRL    |
| endocrine         | POLYCYSTIC OVARIES                               |
| endocrine         | UNSPECIFIED HYPOTHYROIDISM                       |
| endocrine         | DIAB W/O COMP TYPE II/UNS NOT STATED UNCCTRL     |
| endocrine         | NONTOXIC UNINODULAR GOITER                       |
| endocrine         | GOITER, UNSPECIFIED                              |
| endocrine         | GOUT, UNSPECIFIED                                |
| endocrine         | CUSHINGS SYNDROME                                |
| endocrine         | HYPOGLYCEMIA, UNSPECIFIED                        |
| endocrine         | ABNORMALITY OF GAIT                              |
| endocrine         | THYROTOX W/O GOITER/OTH CAUSE W/O CRISIS         |
| endocrine         | UNSPECIFIED ENDOCRINE DISORDER                   |
| endocrine         | DIABETES INSIPIDUS                               |
| endocrine         | DIAB W/OPHTH MANIFESTS TYPE I [JUV] NOT UNCCTRL  |
| endocrine         | UNSPECIFIED DISORDER OF THYROID                  |
| endocrine         | CHRONIC LYMPHOCYTIC THYROIDITIS                  |
| endocrine         | PANHYPOPITUITARISM                               |
| endocrine         | OTHER SPECIFIED DISORDERS OF ADRENAL GLANDS      |
| endocrine         | CYST OF THYROID                                  |
| endocrine         | OTHER OVARIAN DYSFUNCTION                        |
| endocrine         | OTHER SPECIFIED ENDOCRINE DISORDERS              |
| endocrine         | NONSPECIFIC ABNORM RESULTS THYROID FUNCT STUDY   |
| endocrine         | TOX DIFFUSE GOITER W/O THYROTOX CRISIS/STORM     |
| endocrine         | DIAB W/O MENTION COMP TYPE I [JUV TYPE] UNCCTRL  |
| endocrine         | OTH DISTURBANCES AROMATIC AMINO-ACID METABOLISM  |
| endocrine         | PREMATURE MENOPAUSE                              |
| endocrine         | ACUTE THYROIDITIS                                |
| endocrine         | HYPOPARATHYROIDISM                               |
| endocrine         | PITUITARY DWARFISM                               |
| endocrine         | OTHER TESTICULAR HYPOFUNCTION                    |
| endocrine         | DIAB W/O MENTION COMP TYPE II/UNS TYPE UNCCTRL   |
| endocrine         | GLUCOCORTICOID DEFICIENCY                        |

| Diagnosis group | Diagnosis                                        |
|-----------------|--------------------------------------------------|
| endocrine       | DIABETES W/KETOACIDOSIS TYPE I [JUV] UNCCTRL     |
| endocrine       | DIAB W/KETOACIDOS TYPE II/UNS NOT STATED UNCCTRL |
| endocrine       | UNSPECIFIED THYROIDITIS                          |
| endocrine       | DIAB W/RENAL MANIFESTS TYPE I [JUV] NOT UNCCTRL  |
| eye             | MYOPIA                                           |
| eye             | REGULAR ASTIGMATISM                              |
| eye             | HYPERMETROPIA                                    |
| eye             | UNSPECIFIED TEAR FILM INSUFFICIENCY              |
| eye             | UNSPECIFIED DISORDER OF EYE                      |
| eye             | VISUAL DISCOMFORT                                |
| eye             | PAIN IN OR AROUND EYE                            |
| eye             | BLEPHARITIS, UNSPECIFIED                         |
| eye             | HORDEOLUM INTERNUM                               |
| eye             | ANISOMETROPIA                                    |
| eye             | HORDEOLUM EXTERNUM                               |
| eye             | UNSPECIFIED CHRONIC CONJUNCTIVITIS               |
| eye             | UNSPECIFIED CORNEAL ULCER                        |
| eye             | OTHER SCLERAL DISORDER                           |
| eye             | CORNEAL DISORDER DUE TO CONTACT LENS             |
| eye             | OTHER SPECIFIED VISUAL DISTURBANCES              |
| eye             | LATTICE DEGENERATION OF PERIPHERAL RETINA        |
| eye             | UNSPECIFIED CORNEAL DEGENERATION                 |
| eye             | MACULAR CYST HOLE OR PSEUDOHOLE OF RETINA        |
| eye             | OTHER VITREOUS OPACITIES                         |
| eye             | OTHER CHRONIC ALLERGIC CONJUNCTIVITIS            |
| eye             | OTHER AND UNSPECIFIED CONJUNCTIVITIS             |
| eye             | ORBITAL CELLULITIS                               |
| eye             | UNSPECIFIED INFLAMMATION OF EYELID               |
| eye             | UNSPECIFIED VISUAL FIELD DEFECT                  |
| eye             | CHALAZION                                        |
| eye             | UNSPECIFIED SCLERITIS                            |
| eye             | OTHER DISORDERS OF CHOROID                       |
| eye             | UNSPECIFIED IRIDOCYCLITIS                        |
| eye             | GLAUCOMATOUS ATROPHY OF OPTIC DISC               |
| eye             | PRESBYOPIA                                       |
| eye             | IRREGULAR ASTIGMATISM                            |
| eye             | PHOTOKERATITIS                                   |
| eye             | ACUTE ATOPIC CONJUNCTIVITIS                      |
| eye             | RETAINED (OLD) FB INTRAOCULAR UNSPECIFIED        |
| eye             | UNSPECIFIED ASTIGMATISM                          |
| eye             | OTHER COLOR VISION DEFICIENCIES                  |
| eye             | CONJUNCTIVAL HEMORRHAGE                          |



| Diagnosis group | Diagnosis                                        |
|-----------------|--------------------------------------------------|
| eye             | OTHER SPECIFIED DISORDERS OF EYE AND ADNEXA      |
| eye             | OTHER ILL-DEFINED DISORDER OF EYE                |
| eye             | UNSPECIFIED ACUTE INFLAMMATION OF ORBIT          |
| eye             | CONJUNCTIVAL CYSTS                               |
| eye             | UNSPECIFIED DISORDER OF CONJUNCTIVA              |
| eye             | UNSPECIFIED DISORDER OF REFRACTION&ACCOMMODATION |
| eye             | BLINDNESS BOTH EYES IMPAIR LEVL NOT FURTHER SPEC |
| eye             | UNSPECIFIED OPEN-ANGLE GLAUCOMA                  |
| eye             | UNSPECIFIED GLAUCOMA                             |
| eye             | REFRACTIVE AMBLYOPIA                             |
| eye             | OTHER VISUAL DISTORTIONS AND ENTOPTIC PHENOMENA  |
| eye             | UNSPECIFIED CORNEAL OPACITY                      |
| eye             | SCOTOMA OF BLIND SPOT AREA IN VISUAL FIELD       |
| eye             | UNSPECIFIED CHRONIC IRIDOCYCLITIS                |
| eye             | PANUVEITIS                                       |
| eye             | BORDERLINE GLAUCOMA WITH OCULAR HYPERTENSION     |
| eye             | UNSPECIFIED ACUTE AND SUBACUTE IRIDOCYCLITIS     |
| eye             | ABSCESS OF EYELID                                |
| eye             | UNSPECIFIED AMBLYOPIA                            |
| eye             | UNSPECIFIED ESOTROPIA                            |
| eye             | ESOPHORIA                                        |
| eye             | VISION IMPAIR BOTH EYES IMPAIR LEVEL NFS         |
| eye             | UNSPECIFIED DISORDER OF LACRIMAL SYSTEM          |
| eye             | HYPEREMIA OF CONJUNCTIVA                         |
| eye             | UNSPECIFIED HETEROPHORIA                         |
| eye             | ORBITAL EDEMA OR CONGESTION                      |
| eye             | UNSPECIFIED BACKGROUND RETINOPATHY               |
| eye             | UNSPECIFIED RETINAL DISORDER                     |
| eye             | MACULAR DEGENERATION OF RETINA UNSPECIFIED       |
| eye             | UNSPECIFIED PTERYGIUM                            |
| eye             | EDEMA OF EYELID                                  |
| eye             | UNSPECIFIED SUPERFICIAL KERATITIS                |
| eye             | UNSPECIFIED VISUAL DISTURBANCE                   |
| eye             | RECURRENT EROSION OF CORNEA                      |
| eye             | SIMPLE CHRONIC CONJUNCTIVITIS                    |
| eye             | UNSPECIFIED CORNEAL DISORDER                     |
| eye             | MARGINAL CORNEAL ULCER                           |
| eye             | VISUAL DISTORTIONS OF SHAPE AND SIZE             |
| eye             | BORDERLINE GLAUC OPEN ANGLE BL FINDINGS LOW RSK  |
| eye             | SPASM OF ACCOMMODATION                           |
| eye             | UNSPECIFIED RETINAL DEFECT                       |
| eye             | OTHER CORNEAL DISORDER                           |

| Diagnosis group | Diagnosis                                        |
|-----------------|--------------------------------------------------|
| eye             | LOW VISION ONE EYE NOT OTHERWISE SPECIFIED       |
| eye             | CENTRAL SEROUS RETINOPATHY                       |
| eye             | SCOTOMA INVOLVING CENTRAL AREA IN VISUAL FIELD   |
| eye             | UNSPECIFIED DACRYOADENITIS                       |
| eye             | UNSPECIFIED DISORDER OF EYE MOVEMENTS            |
| eye             | CORNEAL EDEMA DUE TO WEARING OF CONTACT LENSES   |
| eye             | CYSTS OF EYELIDS                                 |
| eye             | ORBITAL CYSTS                                    |
| eye             | SOLAR RETINOPATHY                                |
| eye             | VITREOUS HEMORRHAGE                              |
| eye             | PUPILLARY ABNORMALITIES                          |
| eye             | OTHER DISORDERS OF EYELID                        |
| eye             | UNSPECIFIED PTOSIS OF EYELID                     |
| eye             | DEFORMITY OF ORBIT DUE TO TRAUMA OR SURGERY      |
| eye             | DIPLOPIA                                         |
| eye             | UNSPECIFIED DISORDER OF IRIS AND CILIARY BODY    |
| eye             | UNSPECIFIED EXOPHTHALMOS                         |
| eye             | EXOPHORIA                                        |
| eye             | UNSPECIFIED OPTIC NEURITIS                       |
| eye             | MINOR OPACITY OF CORNEA                          |
| eye             | ACUTE CHEMICAL CONJUNCTIVITIS                    |
| eye             | OTHER OPTIC NEURITIS                             |
| eye             | UNSPECIFIED OPTIC ATROPHY                        |
| eye             | SENILE CORNEAL CHANGES                           |
| eye             | CONVERGENCE INSUFF/PALSY BINOCULAR EYE MOVEMENT  |
| eye             | OPTIC PAPILLITIS                                 |
| eye             | ADHESIONS AND DISRUPTIONS OF PUPILLARY MEMBRANES |
| eye             | LIMBAR&CORNEAL INVOLVEMENT VERNAL CONJUNCTIVITIS |
| eye             | STRABISMIC AMBLYOPIA                             |
| eye             | PINGUECULA                                       |
| eye             | VERNAL CONJUNCTIVITIS                            |
| eye             | KERATOCONUS, STABLE CONDITION                    |
| eye             | UNSPECIFIED PREGLAUCOMA                          |
| eye             | CORTICOSTEROID-INDUCED GLAUC GLAUCTOUS STAGE     |
| eye             | PROGRESSIVE HIGH MYOPIA                          |
| eye             | PIGMENTARY RETINAL DYSTROPHY                     |
| eye             | PSEUDOPAPILLEDEMA                                |
| eye             | UNSPECIFIED DACRYOCYSTITIS                       |
| eye             | TRANSIENT ARTERIAL OCCLUSION OF RETINA           |
| eye             | MACULAR KERATITIS                                |
| eye             | CHRONIC DACRYOCYSTITIS                           |
| eye             | VASCULAR ABNORMALITIES OF CONJUNCTIVA            |

| Diagnosis group | Diagnosis                                        |
|-----------------|--------------------------------------------------|
| eye             | PARTIAL ARTERIAL OCCLUSION OF RETINA             |
| eye             | ARTERIAL BRANCH OCCLUSION OF RETINA              |
| eye             | UNSPECIFIED CORNEAL DEPOSIT                      |
| eye             | UNSPECIFIED RETINAL DETACHMENT                   |
| eye             | POSTERIOR SYNECHIAE                              |
| eye             | RETAINED (OLD) FB IN OTHER OR MULT SITES OF EYE  |
| eye.exam        | EXAMINATION OF EYES AND VISION                   |
| eye.hhist       | FAMILY HISTORY OF OTHER EYE DISORDERS            |
| fertility       | OTHER PROCREATIVE MANAGEMENT COUNSELING&ADVICE   |
| fertility       | FERTILITY TESTING                                |
| fertility       | GENETIC COUNSELING                               |
| fertility       | ENCOUNTER FOR FERTILITY PRESERVATION COUNSELING  |
| fertility       | OTHER INVESTIGATION AND TESTING                  |
| fever           | FEVER UNSPECIFIED                                |
| fever           | FEVER & OTH PHYSIOLOGIC DISTURBANCES TEMP REG    |
| flu.shot        | NEED PROPHYLACTIC VACCINATION&INOCULATION FLU    |
| flu.shot        | NEED PROPH VACCINATION&INOCULAT AGAINST FLU      |
| flu.shot        | NEED PROPH VACC AGAINST HEMOPHILUS FLU TYPE B    |
| follow.up       | OTHER FOLLOW-UP EXAMINATION OTHER                |
| gi              | OTH&UNSPEC NONINFECTIOUS GASTROENTERITIS&COLITIS |
| gi              | DIARRHEA                                         |
| gi              | ESOPHAGEAL REFLUX                                |
| gi              | UNS GASTRITIS&GASTRODUODITIS W/O MENTION HEMORR  |
| gi              | VOMITING ALONE                                   |
| gi              | INTESTINAL INFECTION DUE TO OTHER ORGANISM NEC   |
| gi              | NAUSEA WITH VOMITING                             |
| gi              | HEMORRHAGE OF RECTUM AND ANUS                    |
| gi              | UNSPECIFIED CONSTIPATION                         |
| gi              | ING HERN W/O MENTION OBST/GANGREN UNILAT/UNSPEC  |
| gi              | NAUSEA ALONE                                     |
| gi              | CELIAC DISEASE                                   |
| gi              | EXTERNAL HEMORRHOIDS WITHOUT MENTION COMP        |
| gi              | REGIONAL ENTERITIS OF UNSPECIFIED SITE           |
| gi              | UNSPECIFIED FUNCTIONAL DISORDER OF INTESTINE     |
| gi              | FLATULENCE ERUCTATION AND GAS PAIN               |
| gi              | IRRITABLE BOWEL SYNDROME                         |
| gi              | ABDOMINAL PAIN, EPIGASTRIC                       |
| gi              | ANAL FISSURE                                     |
| gi              | DYSPEPSIA&OTHER SPEC DISORDERS FUNCTION STOMACH  |
| gi              | UNSPECIFIED ESOPHAGITIS                          |
| gi              | GALLSTONE ILEUS                                  |
| gi              | PEPTC ULCR UNS ACUT/CHRN W/O HEMOR PERF/OBST     |

| Diagnosis group | Diagnosis                                        |
|-----------------|--------------------------------------------------|
| gi              | APPENDICITIS, UNQUALIFIED                        |
| gi              | ANAL OR RECTAL PAIN                              |
| gi              | INFECTIOUS DIARRHEA                              |
| gi              | INTERNAL HEMORRHOIDS WITHOUT MENTION COMP        |
| gi              | DYSPHAGIA UNSPECIFIED                            |
| gi              | UNSPECIFIED FOOD POISONING                       |
| gi              | HELICOBACTER PYLORI INFECTION                    |
| gi              | PERSISTENT VOMITING                              |
| gi              | ALCOHOLIC GASTRITIS WITHOUT MENTION HEMORRHAGE   |
| gi              | UNSPECIFIED FUNCTIONAL DISORDER OF STOMACH       |
| gi              | UNSPEC HEMORRHOIDS WITHOUT MENTION COMPLICATION  |
| gi              | HERN UNS SITE ABD CAV W/O MENTION OBST/GANGREN   |
| gi              | DIGESTIVE SYSTEM COMPLICATION NEC                |
| gi              | REFLUX ESOPHAGITIS                               |
| gi              | DIARRHEA OF PRESUMED INFECTIOUS ORIGIN           |
| gi              | UNSPECIFIED DISORDER OF INTESTINE                |
| gi              | OTHER SYMPTOMS INVOLVING DIGESTIVE SYSTEM OTHER  |
| gi              | GASTROESOPHAGEAL LACERATION-HEMORRHAGE SYNDROME  |
| gi              | OTHER SPECIFIED DISORDER OF RECTUM AND ANUS      |
| gi              | ATROPHIC GASTRITIS WITHOUT MENTION OF HEMORRHAGE |
| gi              | HEARTBURN                                        |
| gi              | UNSPECIFIED ULCERATIVE COLITIS                   |
| gi              | ANAL SPASM                                       |
| gi              | STRICTURE AND STENOSIS OF ESOPHAGUS              |
| gi              | GIARDIASIS                                       |
| gi              | RESIDUAL HEMORRHOIDAL SKIN TAGS                  |
| gi              | ABNORMAL FECES                                   |
| gi              | UMB HERNIA WITHOUT MENTION OBSTRUCTION/GANGRENE  |
| gi              | ANAL FISTULA                                     |
| gi              | DYSPLASIA OF ANUS                                |
| gi              | UNSPECIFIED HEMORRHOIDS WITH OTHER COMPLICATION  |
| gi              | INTESTINAL INFECTIONS DUE TO CAMPYLOBACTER       |
| gi              | ULCERATIVE PROCTITIS                             |
| gi              | ALCOHOLIC GASTRITIS WITH HEMORRHAGE              |
| gi              | OTHER BACTERIAL FOOD POISONING                   |
| gi              | HERNIA OF UNSPECIFIED SITE WITH OBSTRUCTION      |
| gi              | PERITONEAL ABSCESS                               |
| gi              | DIAPHRAGMAT HERN W/O MENTION OBSTRUCTION/GANGREN |
| gi              | DYSKINESIA OF ESOPHAGUS                          |
| gi              | UNSPECIFIED AMEBIASIS                            |
| gi              | ACUTE ESOPHAGITIS                                |
| gi              | TYPHOID FEVER                                    |

| Diagnosis group | Diagnosis                                        |
|-----------------|--------------------------------------------------|
| gi              | UNSPECIFIED SALMONELLA INFECTION                 |
| gi              | EXTERNAL HEMORRHOIDS WITH OTHER COMPLICATION     |
| gi              | INCONTINENCE OF FECES                            |
| gi              | UNSPECIFIED INTESTINAL OBSTRUCTION               |
| gi              | VOLVULUS                                         |
| gi              | INTUSSUSCEPTION                                  |
| gi              | INTESTINAL INF ENTERITIS DUE OTH VIRAL ENTERITIS |
| gi              | ACUTE APPENDICITIS WITHOUT MENTION PERITONITIS   |
| gi              | ACUT DUODEN ULCER W/PERF W/O MENTION OBSTRUCTION |
| gi              | GASTROPARESIS                                    |
| gi              | DUOD ULCR UNS AS ACUT/CHRON W/O HEMORR PERF/OBST |
| gi              | ING HERN W/O OBST/GANGREN RECUR UNILAT/UNS       |
| gi              | EXTERNAL THROMBOSED HEMORRHOIDS                  |
| gi              | SALMONELLA GASTROENTERITIS                       |
| gi              | EOSINOPHILIC ESOPHAGITIS                         |
| gi              | FECAL SMEARING                                   |
| gi              | OTH VENTRAL HERN W/O MENTION OBSTRUCTION/GANGREN |
| gi              | FULL INCONTINENCE OF FECES                       |
| gyn             | UNSPECIFIED VAGINITIS AND VULVOVAGINITIS         |
| gyn             | CANDIDIASIS OF VULVA AND VAGINA                  |
| gyn             | INGROWING NAIL                                   |
| gyn             | ABSENCE OF MENSTRUATION                          |
| gyn             | UNS D/O MENSTRUATION&OTH ABN BLEED FE GNT TRACT  |
| gyn             | IRREGULAR MENSTRUAL CYCLE                        |
| gyn             | UNSPEC SYMPTOM ASSOC W/FEMALE GENITAL ORGANS     |
| gyn             | OTHER SPECIFIED NONINFLAMMATORY DISORDER VAGINA  |
| gyn             | OVULATION BLEEDING                               |
| gyn             | DYSMENORRHEA                                     |
| gyn             | UNSPECIFIED DISORDER OF FEMALE GENITAL ORGANS    |
| gyn             | OTH D/O MENSTRUATION&OTH ABN BLEED FE GNT TRACT  |
| gyn             | ABNORMAL GLANDULAR PAPANICOLAOU SMEAR OF CERVIX  |
| gyn             | SCANTY OR INFREQUENT MENSTRUATION                |
| gyn             | EXCESSIVE OR FREQUENT MENSTRUATION               |
| gyn             | UNSPEC NONINFLAMMATORY DISORDER VULVA&PERINEUM   |
| gyn             | OTHER AND UNSPECIFIED OVARIAN CYST               |
| gyn             | LUMP OR MASS IN BREAST                           |
| gyn             | UNSPECIFIED NONINFLAMMATORY DISORDER OF VAGINA   |
| gyn             | POSTCOITAL BLEEDING                              |
| gyn             | METRORRHAGIA                                     |
| gyn             | JAW PAIN                                         |
| gyn             | PREMENSTRUAL TENSION SYNDROMES                   |
| gyn.screen      | ROUTINE GYNECOLOGICAL EXAMINATION                |

| Diagnosis group  | Diagnosis                                        |
|------------------|--------------------------------------------------|
| gyn.screen       | PREGNANCY EXAMINATION/TEST PREGNANCY UNCONFIRMED |
| gyn.screen       | GYNECOLOGICAL EXAMINATION                        |
| gyn.screen       | PREGNANCY EXAMINATION OR TEST NEGATIVE RESULT    |
| hearing.exam     | ENCOUNTER FOR HEARING CONSERVATION AND TREATMENT |
| heart.hhist      | FAMILY HISTORY OF ISCHEMIC HEART DISEASE         |
| heart.hhist      | FAMILY HISTORY OF OTHER CARDIOVASCULAR DISEASES  |
| hep.shot         | NEED PROPH VACC&INOCULAT AGAINST VIRAL HEP       |
| hepb.carrier     | HEPATITIS B CARRIER                              |
| hepc.carrier     | HEPATITIS C CARRIER                              |
| high.risk.sex    | PROBLEMS RELATED TO HIGH-RISK SEXUAL BEHAVIOR    |
| history.diabetes | FAMILY HISTORY OF DIABETES MELLITUS              |
| hormone          | HORMONE REPLACEMENT THERAPY                      |
| hypertension     | UNSPECIFIED ESSENTIAL HYPERTENSION               |
| inf.paras.hhist  | FM HX OF INFECTIOUS AND PARASITIC DISEASES       |
| inf.paras.hist   | PERSONAL HX OTH INFECTIOUS&PARASITIC DISEASE     |
| inf.paras.hist   | PERSONAL HX UNSPEC INFECTIOUS&PARASITIC DISEASE  |
| inf.screen       | SCREENING EXAMINATION UNSPEC INFECTIOUS DISEASE  |
| infectious       | UNSPECIFIED URETHRITIS                           |
| infectious       | INFECTIOUS MONONUCLEOSIS                         |
| infectious       | UNSPECIFIED GENITAL HERPES                       |
| infectious       | HERPES ZOSTER WITHOUT MENTION OF COMPLICATION    |
| infectious       | LYME DISEASE                                     |
| infectious       | HERPES SIMPLEX WITHOUT MENTION OF COMPLICATION   |
| infectious       | UNSPECIFIED CYSTITIS                             |
| infectious       | HERPETIC GINGIVOSTOMATITIS                       |
| infectious       | UNSPECIFIED INFECTIOUS AND PARASITIC DISEASES    |
| infectious       | UNSPECIFIED VIRAL EXANTHEM                       |
| infectious       | OTHER SPECIFIED TYPES OF CYSTITIS                |
| infectious       | LYMPHANGITIS                                     |
| infectious       | UNSPECIFIED DISEASES CONJUNCTIVA DUE TO VIRUSES  |
| infectious       | OTHER SPECIFIED DISORDERS OF BLADDER             |
| infectious       | UNSPECIFIED URETHRAL STRICTURE                   |
| infectious       | OTHER URETHRITIS                                 |
| infectious       | POSTPROCEDURAL FEVER                             |
| infectious       | CANDIDIASIS OF MOUTH                             |
| infectious       | HERPETIC WHITLOW                                 |
| infectious       | OTHER SPECIFIED HERPES SIMPLEX COMPLICATIONS     |
| infectious       | UNSPEC OPTHALMIC COMPLICATION HERPES SIMPLEX     |
| infectious       | VIRAL LABYRINTHITIS                              |
| infectious       | ECZEMA HERPETICUM                                |
| infectious       | FEVER PRESENTING CONDITIONS CLASSIFIED ELSEWHERE |
| infectious       | HERPES SIMPLEX DISCIFORM KERATITIS               |

| Diagnosis group | Diagnosis                                        |
|-----------------|--------------------------------------------------|
| injury          | OPEN WOUND UNSPEC SITE WITHOUT MENTION COMP      |
| injury          | OPEN WOUND FINGER WITHOUT MENTION COMPLICATION   |
| injury          | INJURY OTHER&UNSPECIFIED KNEE LEG ANKLE&FOOT     |
| injury          | CONTUSION OF UNSPECIFIED SITE                    |
| injury          | FOOT&TOE SUP FB W/O MAJ OPN WND&W/O MENTION INF  |
| injury          | INJURY OTHER AND UNSPECIFIED FINGER              |
| injury          | INJURY OF FACE AND NECK OTHER AND UNSPECIFIED    |
| injury          | HIP THI LEG&ANK ABRASION/FRICION BURN W/O INF    |
| injury          | OPEN WOUND SCALP WITHOUT MENTION COMPLICATION    |
| injury          | INJURY OTHER&UNSPECIFIED SHOULDER&UPPER ARM      |
| injury          | CRUSHING INJURY OF FINGER                        |
| injury          | OPEN WOUND JAW WITHOUT MENTION COMPLICATION      |
| injury          | OPEN WOUND EXT EAR UNSPEC SITE W/O MENTION COMP  |
| injury          | INJURY OTH&UNSPEC OTH SPEC SITES INCL MULTIPLE   |
| injury          | OTH MULT&UNS SITE SUP FB W/O MAJ OPN WND&W/O INF |
| injury          | OTH MX&UNSPEC SITES BLISTER WITHOUT MENTION INF  |
| injury          | ELB FORARM&WRST INSECT BITE NONVENOMOUS W/O INF  |
| injury          | CONTUSION OF HIP                                 |
| injury          | UNSPECIFIED CONCUSSION                           |
| injury          | ICI OTH&UNS NATR W/O OPEN ICW UNS STATE CONSC    |
| injury          | INJURY OTHER&UNSPECIFIED ELBOW FOREARM&WRIST     |
| injury          | ABRASION/FRICION BURN OTH MX&UNS SITE W/O INF    |
| injury          | INJURY TO NERVES UNSPECIFIED SITE                |
| injury          | BURN UNSPECIFIED DEGREE UNSPECIFIED SITE HAND    |
| injury          | POSTTRAUMATIC WOUND INFECTION NEC                |
| injury          | BURN OF UNSPECIFIED SITE UNSPECIFIED DEGREE      |
| injury          | BLISTR W/EPID LOSS DUE BURN UNSPEC SITE LOW LIMB |
| injury          | OPEN WOUND ELBOW WITHOUT MENTION COMPLICATION    |
| injury          | OPEN WOUND OF ELBOW, COMPLICATED                 |
| injury          | OTH MX&UNS SITE INSECT BITE NONVENOMOUS W/O INF  |
| injury          | INJURY OTHER AND UNSPECIFIED HAND EXCEPT FINGER  |
| injury          | INJURY OTHER AND UNSPECIFIED UNSPECIFIED SITE    |
| injury          | SUPERFICIAL INJURY OF CORNEA                     |
| injury          | FOREIGN BODY IN VULVA AND VAGINA                 |
| injury          | UNSPECIFIED CONTUSION OF EYE                     |
| injury          | OPEN WOUND ABDOMINAL WALL ANTERIOR COMPLICATED   |
| injury          | OPEN WOUND ABD WALL ANT WITHOUT MENTION COMP     |
| injury          | BURN UNSPEC DEGREE UNSPEC SITE UPPER LIMB        |
| injury          | FOOT&TOE BLISTER WITHOUT MENTION OF INFECTION    |
| injury          | MX&UNSPEC OPEN WOUND UPPER LIMB W/O MENTION COMP |
| injury          | HIP THIGH LEG&ANK INSECT BITE NONVENOMOUS INF    |
| injury          | UNSPECIFIED BURN OF EYE AND ADNEXA               |

| Diagnosis group | Diagnosis                                        |
|-----------------|--------------------------------------------------|
| injury          | OTH&UNSPEC SUP INJURY FOOT&TOES W/O MENTION INF  |
| injury          | CONTUSION OF TOE                                 |
| injury          | FOREIGN BODY IN PHARYNX                          |
| injury          | CONTUSION OF CHEST WALL                          |
| injury          | CONTUSION OF BACK                                |
| injury          | CONTUSION OF KNEE                                |
| injury          | FCE NCK&SCLP NO EYE INSECT BITE NONVNOM W/O INF  |
| injury          | OPEN WOUND FT NO TOE ALONE W/TENDON INVOLVEMENT  |
| injury          | OPEN WOUND TOE WITHOUT MENTION COMPLICATION      |
| injury          | CONTUSION OF ELBOW                               |
| injury          | OPEN WOUND HAND NO FINGER ALONE W/O MENTION COMP |
| injury          | CONTUSION OF FACE SCALP AND NECK EXCEPT EYE      |
| injury          | BURN OF UNSPECIFIED DEGREE OF UPPER ARM          |
| injury          | OTHER SPECIFIED OPEN WOUND OF OCULAR ADNEXA      |
| injury          | CONTUSION OF FOOT                                |
| injury          | ELB FORARM&WRST ABRASION/FRICION BURN W/O INF    |
| injury          | TRNK INSECT BITE NONVENOMOUS WITHOUT MENTION INF |
| injury          | OTHER INJURY OF OTHER SITES OF TRUNK             |
| injury          | CONTUSION OF BUTTOCK                             |
| injury          | OPEN WOUND OF TOE, COMPLICATED                   |
| injury          | HND NO FINGR SUP FB W/O MAJ OPN WND&W/O INF      |
| injury          | CONTUSION OF FINGER                              |
| injury          | HAND NO FINGER ALONE ABRAS/FRIC BURN W/O INF     |
| injury          | ERYTHEMA DUE BURN-SINGLE DIGIT OTH THAN THUMB    |
| injury          | OPEN WOUND PENIS WITHOUT MENTION COMPLICATION    |
| injury          | BURN UNSPEC DEGREE UNSPEC SITE LOWER LIMB        |
| injury          | INJURY TO BRACHIAL PLEXUS                        |
| injury          | HEAD INJURY, UNSPECIFIED                         |
| injury          | BLISTERS W/EPIDERMAL LOSS DUE BURN UNSPEC SITE   |
| injury          | FOREIGN BODY IN UNSPECIFIED SITE ON EXTERNAL EYE |
| injury          | HAND NO FINGER ALONE BLISTER WITHOUT MENTION INF |
| injury          | CONTUSION OF LOWER LEG                           |
| injury          | CONTUSION OF ANKLE                               |
| injury          | HIP THIGH LEG&ANK ABRASION/FRICTION BURN INF     |
| injury          | INJURY TO PERONEAL NERVE                         |
| injury          | CONTUSION OF MULTIPLE SITES NEC                  |
| injury          | FOREIGN BODY IN EAR                              |
| injury          | FCE NCK&SCLP NO EYE ABRAS/FRIC BURN W/O INF      |
| injury          | FINGER SUP FB W/O MAJ OPEN WOUND&W/O MENTION INF |
| injury          | HIP THI LEG&ANK INSECT BITE NONVENOMOUS W/O INF  |
| injury          | OPEN WOUND FACE UNSPEC SITE WITHOUT MENTION COMP |
| injury          | CONCUSSION WITH NO LOSS OF CONSCIOUSNESS         |



| Diagnosis group | Diagnosis                                        |
|-----------------|--------------------------------------------------|
| injury          | BURN OF UNSPECIFIED DEGREE OF CHIN               |
| injury          | CONTUSION OF ORBITAL TISSUES                     |
| injury          | ELB FOREARM&WRIST INSECT BITE NONVENOMOUS INF    |
| injury          | OTH&UNS SUP INJR OTH MX&UNS SITE W/O MENTION INF |
| injury          | OPEN WOUND TONGUE&FLR MOUTH WITHOUT MENTION COMP |
| injury          | CONTUSION OF THIGH                               |
| injury          | CONTUSION OF UNSPECIFIED PART OF LOWER LIMB      |
| injury          | OPEN WOUND KNEE LEG&ANK WITHOUT MENTION COMP     |
| injury          | OPEN WOUND MOUTH UNSPEC SITE W/O MENTION COMP    |
| injury          | INJURY OTHER AND UNSPECIFIED HIP AND THIGH       |
| injury          | BLISTERS WITH EPIDERMAL LOSS DUE TO BURN OF FOOT |
| injury          | HAND EXCEPT FINGER ALONE BLISTER INFECTED        |
| injury          | OPEN WOUND FOREHEAD WITHOUT MENTION COMPLICATION |
| injury          | OPEN WOUND OF UNSPECIFIED SITE COMPLICATED       |
| injury          | OTHER EARLY COMPLICATIONS OF TRAUMA              |
| injury          | FOREIGN BODY IN DIGESTIVE SYSTEM UNSPECIFIED     |
| injury          | FOREIGN BODY IN CONJUNCTIVAL SAC                 |
| injury          | FOOT&TOE SUP FB WITHOUT MAJOR OPEN WOUND INF     |
| injury          | CONTUSION OF UNSPECIFIED PART OF TRUNK           |
| injury          | FOREIGN BODY IN CORNEA                           |
| injury          | INJURY TO DIGITAL NERVE, UPPER LIMB              |
| injury          | MX&UNSPEC OPEN WOUND UPPER LIMB W/TENDON INVLV   |
| injury          | CONCUSSION WITH LOC OF UNSPECIFIED DURATION      |
| injury          | OPEN WOUND WRIST WITHOUT MENTION COMPLICATION    |
| injury          | ERYTHEMA DUE TO BURN UNSPECIFIED SITE            |
| injury          | OPEN WOUND VULVA WITHOUT MENTION COMPLICATION    |
| injury          | BURN OF UNSPECIFIED DEGREE OF PALM OF HAND       |
| injury          | BURN UNSPEC DEGREE UNSPEC SITE FACE&HEAD         |
| injury          | BLACK EYE, NOT OTHERWISE SPECIFIED               |
| injury          | CONTUSION OF WRIST                               |
| injury          | FOREIGN BODY IN MOUTH                            |
| injury          | OPEN WOUND OF KNEE LEG AND ANKLE COMPLICATED     |
| injury          | FOREIGN BODY IN ESOPHAGUS                        |
| injury          | CONTUSION OF GENITAL ORGANS                      |
| injury          | CONTUSION OF UPPER ARM                           |
| injury          | OPEN WOUND BREAST WITHOUT MENTION COMPLICATION   |
| injury          | OPEN WOUND OF GUM , COMPLICATED                  |
| injury          | HAND NO FINGER ALONE ABRASION/FRICTION BURN INF  |
| injury          | CRUSHING INJURY OF HAND                          |
| injury          | TRUNK ABRASION/FRICTION BURN WITHOUT MENTION INF |
| injury          | SUBDURAL HEMOR FLW INJR W/O OPN ICW UNS SOC      |
| injury          | CONTUSION OF SHOULDER REGION                     |

| Diagnosis group | Diagnosis                                         |
|-----------------|---------------------------------------------------|
| injury          | BURN <10% BODY SURF W/3RD DEG BURN<10%/UNS AMT    |
| injury          | UNSPECIFIED OPEN WOUND OF EYEBALL                 |
| injury          | TOOTH BROKEN FX DUE TO TRAUMA W/O MENTION COMP    |
| injury          | SUPERIOR MESENTERIC ARTERY INJURY                 |
| injury          | OPEN WOUND AUDITRY CANAL WITHOUT MENTION COMP     |
| injury          | OPEN WOUND HIP&THIGH WITHOUT MENTION COMP         |
| injury          | OTH&UNS SUP INJURY FCE NCK&SCLP W/O MENTION INF   |
| injury          | OPEN WOUND VAGINA WITHOUT MENTION COMPLICATION    |
| injury          | BURN-UNS DEG-2/MORE DIGITS OF HAND NOT THUMB      |
| injury          | FOOT AND TOE, BLISTER, INFECTED                   |
| injury          | BURN-UNS DEGREE-1 FINGER OTH THAN THUMB           |
| injury          | OPEN WOUND OF CHEEK, COMPLICATED                  |
| injury          | CONTUSION OF MULTIPLE SITES OF LOWER LIMB         |
| injury          | BURN OF UNSPECIFIED DEGREE OF FOOT                |
| injury          | INJURY TO MULTIPLE NERVES IN SEVERAL PARTS        |
| injury          | CONTUSION OF EYELIDS AND PERIOCCULAR AREA         |
| injury          | LACERATION OF SKIN OF EYELID AND PERIOCCULAR AREA |
| injury          | OPEN WOUND FT NO TOE ALONE WITHOUT MENTION COMP   |
| injury          | UNSPEC SITE SP CORD INJURY W/O SP BN INJURY       |
| injury          | OPEN WOUND OF FOOT EXCEPT TOE ALONE COMPLICATED   |
| injury          | OTH MX&UNSPEC SITES ABRASION/FRICTION BURN INF    |
| injury          | CRUSHING INJURY OF TOE                            |
| injury          | CRUSHING INJURY OF UNSPECIFIED SITE               |
| injury          | OPEN WOUND NOSE UNSPEC SITE WITHOUT MENTION COMP  |
| injury          | INJURY TO TRIGEMINAL NERVE                        |
| injury          | FINGER INSECT BITE NONVENOMOUS W/O MENTION INF    |
| injury          | FRACTURE OF CORPUS CAVERNOSUM PENIS               |
| injury          | ABRASION/FRICTION BURN FOOT&TOE W/O MENTION INF   |
| injury          | ABRASION/FRICTION BURN FINGER W/O MENTION INF     |
| injury          | BURN OF UNSPECIFIED DEGREE OF LIP                 |
| injury          | BURN OF UNSPECIFIED DEGREE OF BACK OF HAND        |
| injury          | CONTUSION OF EYEBALL                              |
| injury          | BLISTERS W/EPID LOSS-BURN-MULT SITE-WRIST&HAND    |
| injury          | CONTUSION OF FOREARM                              |
| injury          | CRUSHING INJURY OF FOOT                           |
| injury          | OPEN WOUND EAR PART UNSPEC WITHOUT MENTION COMP   |
| injury          | FINGER, BLISTER, INFECTED                         |
| injury          | OTH&UNSPEC SUP INJURY TRUNK WITHOUT MENTION INF   |
| injury          | TRUNK INSECT BITE NONVENOMOUS INFECTED            |
| injury          | BURN OF UNSPECIFIED DEGREE OF THUMB               |
| injury          | SUPERFICIAL INJURY OF EYELIDS&PERIOCCULAR AREA    |
| injury          | BURN OF UNSPECIFIED DEGREE OF NOSE                |

| Diagnosis group | Diagnosis                                        |
|-----------------|--------------------------------------------------|
| injury          | UNSPEC LUNG INJURY W/O MENTION OPN WOUND IN THOR |
| injury          | ESOPH INJURY W/O MENTION OPEN WOUND INTO CAVITY  |
| injury          | OPEN WOUND OTH&UNSPEC PART TRNK W/O MENTION COMP |
| injury          | CONCUSSION WITH LOC OF 30 MINUTES OR LESS        |
| injury          | BLISTERS W/EPIDERMAL LOSS DUE TO BURN OF FOREARM |
| injury          | OPEN WOUND SCROTUM&TESTES WITHOUT MENTION COMP   |
| injury          | BURN UNSPEC DEGREE MULTIPLE SITES WRIST&HAND     |
| injury          | OPEN WOUND PALATE WITHOUT MENTION COMPLICATION   |
| injury          | OPEN WOUND LIP WITHOUT MENTION COMPLICATION      |
| injury.obs      | OBSERVATION FOLLOWING OTHER INFLICTED INJURY     |
| immune          | MULTIPLE SCLEROSIS                               |
| immune          | HUMAN IMMUNODEFICIENCY VIRUS [HIV]               |
| immune          | SYSTEMIC LUPUS ERYTHEMATOSUS                     |
| immune          | OTHER SPEC DISORDERS INVOLVING IMMUNE MECHANISM  |
| immune          | UNSPECIFIED IMMUNITY DEFICIENCY                  |
| immune          | RHEUMATOID ARTHRITIS                             |
| immune          | UNSPECIFIED DISORDER OF IMMUNE MECHANISM         |
| latex.allergy   | PERSONAL HISTORY OF ALLERGY TO LATEX             |
| leukemia.hist   | PERSONAL HISTORY OF MYELOID LEUKEMIA             |
| liver           | UNSPECIFIED CHRONIC HEPATITIS                    |
| liver           | CHRONIC HEPATITIS C WITHOUT MENTION HEPATIC COMA |
| liver           | CALCU GALLBLADD W/O MENTION CHOLECYST/OBST       |
| liver           | UNSPECIFIED DISORDER OF LIVER                    |
| liver           | ACUTE HEPATITIS C WITHOUT MENTION HEPATIC COMA   |
| liver           | OTHER CHRONIC NONALCOHOLIC LIVER DISEASE         |
| liver           | VIRL HEP B W/O HEP COMA ACUT/UNS W/O HEP DELTA   |
| liver           | UNSPECIFIED HEPATITIS                            |
| liver           | AUTOIMMUNE HEPATITIS                             |
| liver           | ACUTE AND SUBACUTE NECROSIS OF LIVER             |
| liver           | UNSPEC VIRAL HEPATITIS WITHOUT MENTION HEP COMA  |
| longterm.med    | LONG-TERM (CURRENT) USE OF OTHER MEDICATIONS     |
| longterm.med    | LONG-TERM (CURRENT) USE OF ANTICOAGULANTS        |
| lri             | ACUTE BRONCHOSPASM                               |
| lri             | RESPIRATORY CONDS DUE OTHER SPEC EXTERNAL AGENTS |
| lri             | PNEUMONIA, ORGANISM UNSPECIFIED                  |
| lri             | ACUTE BRONCHITIS                                 |
| lri             | BRONCHOPNEUMONIA ORGANISM UNSPECIFIED            |
| lri             | BRONCHITIS NOT SPECIFIED AS ACUTE OR CHRONIC     |
| lri             | INTERSTITIAL EMPHYSEMA                           |
| lri             | OTHER PNEUMOTHORAX AND AIR LEAK                  |
| lri             | OTHER DISEASES OF TRACHEA AND BRONCHUS           |
| lri             | PNEUMONIA DUE TO MYCOPLASMA PNEUMONIAE           |

| Diagnosis group    | Diagnosis                                        |
|--------------------|--------------------------------------------------|
| lri                | ACUTE LARYNGOTRACHEITIS W/O MENTION OBSTRUCTION  |
| lri                | PLEURISY WITHOUT MENTION EFFUS/CURRENT TB        |
| lri                | ACUTE TRACHEITIS WITHOUT MENTION OF OBSTRUCTION  |
| lri                | PULMONARY CONGESTION AND HYPOSTASIS              |
| lri                | TUBERCULOUS PNEUMONIA TUBERCLE BACILLI FOUND MIC |
| lri                | TUBERCULOSIS LUNG INFILTRATIVE CONF UNSPEC       |
| lri                | UNSPECIFIED BACTERIAL PNEUMONIA                  |
| lri                | WHEEZING                                         |
| lri                | HEMOPTYSIS UNSPECIFIED                           |
| lri                | PNEUMOCOCCAL PNEUMONIA                           |
| lri                | UNSPECIFIED EUSTACHIAN SALPINGITIS               |
| lri                | TB OF LUNG WITH CAVITATION-OTH TEST              |
| lri                | BACTERIAL INFECTION UNSPECIFIED CCE & UNS SITE   |
| lri                | RESPIRATORY CONDITIONS DUE UNSPEC EXTERNAL AGENT |
| lri                | STREPTOCOCCAL SEPTICEMIA                         |
| lri                | UNSPECIFIED CHRONIC BRONCHITIS                   |
| lri                | PNEUMONIA DUE TO OTHER SPECIFIED BACTERIA        |
| lri                | SEPTICEMIA DUE UNSPEC GRAM-NEGATIVE ORGANISM     |
| lymph              | ENLARGEMENT OF LYMPH NODES                       |
| male.gen           | OTHER INFLAMMATORY DISORDERS OF PENIS            |
| male.gen           | UNSPECIFIED ORCHITIS AND EPIDIDYMITIS            |
| male.gen           | OTHER SPECIFIED DISORDER OF PENIS                |
| male.gen           | REDUNDANT PREPUCE AND PHIMOSIS                   |
| male.gen           | OTHER SPECIFIED DISORDER OF MALE GENITAL ORGANS  |
| male.gen           | BALANOPOSTHITIS                                  |
| male.gen           | UNSPECIFIED DISORDER OF MALE GENITAL ORGANS      |
| male.gen           | UNSPECIFIED PROSTATITIS                          |
| malignant.neoplasm | SCREENING FOR MALIGNANT NEOPLASM OF THE SKIN     |
| malignant.neoplasm | SCREENING FOR MALIGNANT NEOPLASM OF THE CERVIX   |
| marital.counseling | COUNSELING MARITAL&PARTNER PROBLEMS UNSPECIFIED  |
| measles.shot       | NEED PROPH VACC W/MEASLES-MUMPS-RUBELLA VACCINE  |
| med.cert           | OTHER ISSUE OF MEDICAL CERTIFICATES              |
| melanoma.hist      | PERSONAL HISTORY OF MALIGNANT MELANOMA OF SKIN   |
| mental.obs         | OBSERVATION OF OTHER SUSPECTED MENTAL CONDITION  |
| mouth              | OTHER&UNSPECIFIED DISEASES THE ORAL SOFT TISSUES |
| mouth              | ORAL APHTHAE                                     |
| mouth              | GLOSSODYNIA                                      |
| mouth              | UNSPECIFIED DISORDER TEETH&SUPPORTING STRUCTURES |
| mouth              | UNSPECIFIED DISEASE OF THE JAWS                  |
| mouth              | HYPERTROPHY OF TONGUE PAPILLAE                   |
| mouth              | STOMATITIS AND MUCOSITIS UNSPECIFIED             |
| mouth              | DISEASES OF LIPS                                 |

| Diagnosis group | Diagnosis                                        |
|-----------------|--------------------------------------------------|
| mouth           | UNSPECIFIED TEMPOROMANDIBULAR JOINT DISORDERS    |
| mouth           | DISEASES HARD TISSUES TEETH ABRASION UNSPECIFIED |
| mouth           | ACUTE APICAL PERIODONTITIS OF PULPAL ORIGIN      |
| mouth           | UNSPECIFIED CONDITION OF THE TONGUE              |
| mouth           | LEUKOPLAKIA OF ORAL MUCOSA INCLUDING TONGUE      |
| mouth           | DISTURBANCES IN TOOTH ERUPTION                   |
| mouth           | TMJ SOUNDS ON OPENING AND/OR CLOSING THE JAW     |
| mouth           | CELLULITIS AND ABSCESS OF ORAL SOFT TISSUES      |
| mouth           | DISTURBANCE OF SALIVARY SECRETION                |
| mouth           | PERIAPICAL ABSCESS WITHOUT SINUS                 |
| mouth           | SIALOADENITIS                                    |
| mouth           | CHRONIC GINGIVITIS PLAQUE INDUCED                |
| mouth           | OTHER SPECIFIED DISEASES OF THE SALIVARY GLANDS  |
| mouth           | MUCOCELE OF SALIVARY GLAND                       |
| mouth           | UNSPECIFIED GINGIVAL AND PERIODONTAL DISEASE     |
| mouth           | UNSPECIFIED DISEASE OF THE SALIVARY GLANDS       |
| mouth           | CHRONIC PERIODONTITIS UNSPECIFIED                |
| mouth           | UNSPECIFIED DISEASE OF HARD TISSUES OF TEETH     |
| mouth           | SIALOLITHIASIS                                   |
| mouth           | ANTERIOR SOFT TISSUE IMPINGEMENT                 |
| mouth           | HYPERTROPHY OF SALIVARY GLAND                    |
| mouth           | GEOGRAPHIC TONGUE                                |
| mouth           | DEVIATION IN OPENING AND CLOSING OF THE MANDIBLE |
| mouth           | GLOSSITIS                                        |
| mouth           | EXOSTOSIS OF JAW                                 |
| mouth           | LIMITED MANDIBULAR RANGE OF MOTION               |
| mouth           | OTHER SPEC DISORDERS TEETH&SUPPORTING STRUCTURES |
| mouth           | ALVEOLITIS OF JAW                                |
| mouth           | CYSTS OF ORAL SOFT TISSUES                       |
| mouth           | UNSPECIFIED DISORDER TOOTH DEVELOPMENT&ERUPTION  |
| mouth           | ABNORMAL JAW CLOSURE                             |
| mouth           | ARTICULAR DISC DISORDER OF TMJ                   |
| mouth           | OTHER SPECIFIED PERIODONTAL DISEASES             |
| mouth           | CANCRUM ORIS                                     |
| msk             | PAIN IN JOINT, LOWER LEG                         |
| msk             | OTHER DISORDER OF MUSCLE LIGAMENT AND FASCIA     |
| msk             | UNSPECIFIED BACKACHE                             |
| msk             | GANGLION OF JOINT                                |
| msk             | PAIN IN JOINT, FOREARM                           |
| msk             | LUMBAGO                                          |
| msk             | UNSPECIFIED SITE OF ANKLE SPRAIN AND STRAIN      |
| msk             | PAIN IN JOINT PELVIC REGION AND THIGH            |

| Diagnosis group | Diagnosis                                        |
|-----------------|--------------------------------------------------|
| msk             | PAIN IN JOINT, ANKLE AND FOOT                    |
| msk             | SPRAIN&STRAIN OF UNSPECIFIED SITE OF HIP&THIGH   |
| msk             | TENOSYNOVITIS OF FOOT AND ANKLE                  |
| msk             | SPASM OF MUSCLE                                  |
| msk             | SPRAIN&STRAIN OTHER SPECIFIED SITES HIP&THIGH    |
| msk             | CERVICALGIA                                      |
| msk             | OTHER ACQUIRED DEFORMITY OF ANKLE AND FOOT OTHER |
| msk             | SPRAIN AND STRAIN OF UNSPECIFIED SITE OF BACK    |
| msk             | UNSPECIFIED MYALGIA AND MYOSITIS                 |
| msk             | PAIN IN SOFT TISSUES OF LIMB                     |
| msk             | ENTHESOPATHY OF UNSPECIFIED SITE                 |
| msk             | PAIN IN JOINT OTHER SPECIFIED SITES              |
| msk             | CLOSED FRACTURE OF METATARSAL BONE               |
| msk             | LESION OF PLANTAR NERVE                          |
| msk             | PAIN IN JOINT, SITE UNSPECIFIED                  |
| msk             | OTHER SYMPTOMS REFERABLE TO HAND JOINT           |
| msk             | UNSPECIFIED DISORDER OF LOWER LEG JOINT          |
| msk             | BUNION                                           |
| msk             | PAIN IN JOINT, SHOULDER REGION                   |
| msk             | OTHER JOINT DERANGEMENT NEC SHOULDER REGION      |
| msk             | SPRAIN&STRAIN OTH SPEC SITES SHOULDER&UPPER ARM  |
| msk             | CLOSED ANTERIOR DISLOCATION OF HUMERUS           |
| msk             | CHONDROMALACIA OF PATELLA                        |
| msk             | NECK SPRAIN AND STRAIN                           |
| msk             | TEAR MEDIAL CARTILAGE OR MENISCUS KNEE CURRENT   |
| msk             | OTHER TENOSYNOVITIS OF HAND AND WRIST            |
| msk             | CLOSED FRACTURE UNSPEC PHALANX/PHALANGES HAND    |
| msk             | SPRAIN AND STRAIN OF INTERPHALANGEAL OF HAND     |
| msk             | CLOSED DISLOCATION OF FINGER UNSPECIFIED PART    |
| msk             | OTHER SYMPTOMS REFERABLE TO FOREARM JOINT        |
| msk             | SPRAIN AND STRAIN OF CRUCIATE LIGAMENT OF KNEE   |
| msk             | SPRAIN&STRAIN OF UNSPECIFIED SITE OF KNEE&LEG    |
| msk             | CLOSED FRACTURE METACARPAL BONE SITE UNSPECIFIED |
| msk             | SCOLIOSIS , IDIOPATHIC                           |
| msk             | OTHER SYMPTOMS REFERABLE TO BACK                 |
| msk             | UNSPECIFIED ANKLE AND FOOT JOINT DERANGEMENT     |
| msk             | OTHER AFFECTIONS OF SHOULDER REGION NEC          |
| msk             | SPRAIN&STRAIN LATERAL COLLATERAL LIGAMENT KNEE   |
| msk             | PAIN IN JOINT, UPPER ARM                         |
| msk             | UNSPECIFIED NEURALGIA NEURITIS AND RADICULITIS   |
| msk             | PAIN IN THORACIC SPINE                           |
| msk             | EFFUSION OF ANKLE AND FOOT JOINT                 |

| Diagnosis group | Diagnosis                                        |
|-----------------|--------------------------------------------------|
| msk             | CARPAL TUNNEL SYNDROME                           |
| msk             | SPRAIN AND STRAIN OF METACARPOPHALANGEAL OF HAND |
| msk             | BRACHIAL NEURITIS OR RADICULITIS NOS             |
| msk             | MONONEURITIS OF UNSPECIFIED SITE                 |
| msk             | LESION OF ULNAR NERVE                            |
| msk             | BICIPITAL TENOSYNOVITIS                          |
| msk             | UNSPEC DISORDERS BURSAE&TENDONS SHOULDER REGION  |
| msk             | PLANTAR FASCIAL FIBROMATOSIS                     |
| msk             | OTHER JOINT DERANGEMENT NEC ANKLE AND FOOT       |
| msk             | CLOSED FRACTURE OF RIB, UNSPECIFIED              |
| msk             | THORACIC SPRAIN AND STRAIN                       |
| msk             | UNSPECIFIED SYNOVITIS AND TENOSYNOVITIS          |
| msk             | SPRAIN&STRAIN UNSPEC SITE SHOULDER&UPPER ARM     |
| msk             | UNSPECIFIED SITE OF SPRAIN AND STRAIN            |
| msk             | OTHER SYNOVITIS AND TENOSYNOVITIS                |
| msk             | UNSPECIFIED ENTHESOPATHY OF ANKLE AND TARSUS     |
| msk             | OTHER ENTHESOPATHY OF ANKLE AND TARSUS           |
| msk             | SWELLING OF LIMB                                 |
| msk             | ACHILLES BURSITIS OR TENDINITIS                  |
| msk             | CLOSED DISLOCATION OF PATELLA                    |
| msk             | OTHER SYMPTOMS REFERABLE TO ANKLE AND FOOT JOINT |
| msk             | OTHER&UNSPECIFIED DISC DISORDER OF LUMBAR REGION |
| msk             | POSTLAMINECTOMY SYNDROME LUMBAR REGION           |
| msk             | DISPLCMT LUMBAR INTERVERT DISC W/O MYELOPATHY    |
| msk             | CLOSED DISLOCATION OF SHOULDER UNSPECIFIED SITE  |
| msk             | UNSPECIFIED DISORDER OF SHOULDER JOINT           |
| msk             | UNSPECIFIED CLOSED FRACTURE OF CARPAL BONE       |
| msk             | PATELLAR TENDINITIS                              |
| msk             | DEGENERATION INTERVERTEBRAL DISC SITE UNSPEC     |
| msk             | SCIATICA                                         |
| msk             | PREPATELLAR BURSITIS                             |
| msk             | OTHER BURSITIS DISORDERS                         |
| msk             | OLECRANON BURSITIS                               |
| msk             | SPRAIN&STRAIN OF TIBIOFIBULAR SUPERIOR OF KNEE   |
| msk             | CLOSED FRACTURE OF OTHER BONE OF WRIST           |
| msk             | CLOSED FRACTURE OF SHAFT OF CLAVICLE             |
| msk             | UNSPECIFIED PART OF CLOSED FRACTURE OF CLAVICLE  |
| msk             | SPRAIN AND STRAIN OF MCL OF KNEE                 |
| msk             | UNSPEC HEREDIT&IDIOPATHIC PERIPHERAL NEUROPATHY  |
| msk             | OTHER PERIPHERAL ENTHESOPATHIES                  |
| msk             | STIFFNESS OF JOINT NEC PELVIC REGION AND THIGH   |
| msk             | SPRAIN AND STRAIN OF UNSPECIFIED SITE OF HAND    |

| Diagnosis group | Diagnosis                                        |
|-----------------|--------------------------------------------------|
| msk             | CLOSED FRACTURE OF ONE OR MORE PHALANGES OF FOOT |
| msk             | UNSPECIFIED DISORDER OF MUSCLE LIGAMENT&FASCIA   |
| msk             | CLOSED DISLOCATION MULTIPLE&ILL-DEFINED SITES    |
| msk             | CLOSED FRACTURE OF UNSPECIFIED PART OF FIBULA    |
| msk             | UNSPECIFIED CLOSED FRACTURE OF ANKLE             |
| msk             | CLOSED FRACTURE OF LATERAL MALLEOLUS             |
| msk             | NASAL BONES, CLOSED FRACTURE                     |
| msk             | VILLONODULAR SYNOVITIS, LOWER LEG                |
| msk             | OTH&UNSPEC CLOSED FRACTURES PROXIMAL END RADIUS  |
| msk             | OTHER SYMPTOMS REFERABLE JOINT OTHER SPEC SITE   |
| msk             | TORTICOLLIS, UNSPECIFIED                         |
| msk             | DISPLCMT CERV INTERVERT DISC WITHOUT MYELOPATHY  |
| msk             | OTHER&UNSPECIFIED DISC DISORDER CERVICAL REGION  |
| msk             | OTHER JOINT DERANGEMENT NEC LOWER LEG            |
| msk             | ACQUIRED SPONDYLOLISTHESIS                       |
| msk             | SPRAIN&STRAIN OTHER SPECIFIED SITES KNEE&LEG     |
| msk             | LOC OSTEOARTHROS NOT SPEC PRIM/SEC LOWER LEG     |
| msk             | OSTEOCHONDRITIS DISSECANS                        |
| msk             | CLOSED DISLOCATION OF TARSAL JOINT UNSPECIFIED   |
| msk             | CLOSED DISLOCATION OF FOOT UNSPECIFIED PART      |
| msk             | CLOSED FRACTURE OF UNSPECIFIED BONE OF FOOT      |
| msk             | OTHER UNSPECIFIED BACK DISORDER                  |
| msk             | SPRAIN AND STRAIN OF STERNUM UNSPECIFIED PART    |
| msk             | OTHER ANKLE SPRAIN AND STRAIN                    |
| msk             | CLOSED FRACTURE OF HEAD OF RADIUS                |
| msk             | CLOSED FRACTURE OF CUBOID BONE                   |
| msk             | SPRAIN AND STRAIN OF UNSPECIFIED SITE OF FOOT    |
| msk             | CLOSED FRACTURE UNSPEC PART LOWER END HUMERUS    |
| msk             | CLOSED DISLOCATION OF METACARPOPHALANGEAL        |
| msk             | CLOSED FRACTURE OF CALCANEUS                     |
| msk             | OTHER DISORDER OF COCCYX                         |
| msk             | DISORDERS OF SACRUM                              |
| msk             | MEDIAL EPICONDYLITIS OF ELBOW                    |
| msk             | GANGLION OF TENDON SHEATH                        |
| msk             | UNSPECIFIED ENTHESOPATHY OF KNEE                 |
| msk             | SPRAIN AND STRAIN OF RIBS                        |
| msk             | RESIDUAL FOREIGN BODY IN SOFT TISSUE             |
| msk             | SPRAIN AND STRAIN OF UNSPECIFIED SITE OF WRIST   |
| msk             | ENTHESOPATHY OF HIP REGION                       |
| msk             | RADIAL STYLOID TENOSYNOVITIS                     |
| msk             | CLOSED FRACTURE OF UNSPECIFIED PART OF ULNA      |
| msk             | CLOSED FRACTURE OF DISTAL END OF ULNA            |



| Diagnosis group | Diagnosis                                        |
|-----------------|--------------------------------------------------|
| msk             | CLOSED FRACTURE OF NAVICULAR BONE OF WRIST       |
| msk             | CLOSED DISLOCATION OF ACROMIOCLAVICULAR          |
| msk             | CLOSED UNSPECIFIED DISLOCATION OF ELBOW          |
| msk             | ARTICULAR CARTILAGE DISORDER FOREARM             |
| msk             | ROTATOR CUFF SPRAIN AND STRAIN                   |
| msk             | OTHER SYMPTOMS REFERABLE TO PELVIC JOINT         |
| msk             | THORACIC/LUMBOSACRAL NEURITIS/RADICULITIS UNSPEC |
| msk             | CLOSED FRACTURE OF UNSPECIFIED PART OF RADIUS    |
| msk             | DEGENERATION OF CERVICAL INTERVERTEBRAL DISC     |
| msk             | OTHER AND UNSPECIFIED DISORDERS OF SOFT TISSUE   |
| msk             | PES ANSERINUS TENDINITIS OR BURSITIS             |
| msk             | UNSPECIFIED DISORDER OF UPPER ARM JOINT          |
| msk             | OTH MUSCULOSKELETAL SX REFERABLE LIMBS OTH       |
| msk             | PLICA SYNDROME                                   |
| msk             | UNSPECIFIED GANGLION                             |
| msk             | DISORDERS OF SOFT TISSUE UNSPECIFIED             |
| msk             | LATERAL EPICONDYLITIS OF ELBOW                   |
| msk             | SPRAIN&STRAIN UNSPECIFIED SITE ELBOW&FOREARM     |
| msk             | OTHER SPECIFIED SITES OF SPRAINS AND STRAINS     |
| msk             | ADHESIVE CAPSULITIS OF SHOULDER                  |
| msk             | UNSPECIFIED DISORDER JOINT PELVIC REGION&THIGH   |
| msk             | STIFFNESS OF JOINT NEC LOWER LEG                 |
| msk             | SPRAIN AND STRAIN OF CARPOMETACARPAL OF HAND     |
| msk             | CLOSED FRACTURE OF TRAPEZIUM BONE OF WRIST       |
| msk             | SPRAIN AND STRAIN OF METATARSAOPHALANGEAL        |
| msk             | STRESS FRACTURE OF THE METATARSALS               |
| msk             | TIBIALIS TENDINITIS                              |
| msk             | OTHER FOOT SPRAIN AND STRAIN                     |
| msk             | OTHER HAND SPRAIN AND STRAIN                     |
| msk             | CLOSED FRACTURE DISTAL PHALANX OR PHALANGES HAND |
| msk             | CLOSED FRACTURE OF SHAFT OF FEMUR                |
| msk             | BOUTONNIERE DEFORMITY                            |
| msk             | CLOSED DISLOCATION OF OTHER PART OF FOOT         |
| msk             | SPRAIN AND STRAIN OF COCCYX                      |
| msk             | SYNOVIAL CYST OF POPLITEAL SPACE                 |
| msk             | OTHER SYMPTOMS REFERABLE TO LOWER LEG JOINT      |
| msk             | CLOSED FRACTURE OF SHAFT OF FIBULA               |
| msk             | CLOSED FRACTURE OF UNSPECIFIED PART OF TIBIA     |
| msk             | SPRAIN&STRAIN OTHER SPEC SITES ELBOW&FOREARM     |
| msk             | PAIN IN JOINT, HAND                              |
| msk             | CRAMP OF LIMB                                    |
| msk             | LUMBAR SPRAIN AND STRAIN                         |

| Diagnosis group | Diagnosis                                        |
|-----------------|--------------------------------------------------|
| msk             | CLOSED FRACTURE OF NAVICULAR BONE OF FOOT        |
| msk             | OPEN FRACTURE OF UNSPECIFIED PART OF HUMERUS     |
| msk             | SPRAIN AND STRAIN OF INTERPHALANGEAL OF TOE      |
| msk             | ULNAR COLLATERAL LIGAMENT SPRAIN AND STRAIN      |
| msk             | EXOSTOSIS OF UNSPECIFIED SITE                    |
| msk             | CLOSED POSTERIOR DISLOCATION OF ELBOW            |
| msk             | SPRAIN AND STRAIN OF TIBIOFIBULAR                |
| msk             | CLOSED FRACTURE OF MEDIAL MALLEOLUS              |
| msk             | OTHER&UNSPEC DISC DISORDER UNSPEC REGION         |
| msk             | SPRAIN AND STRAIN OF TARSOMETATARSAL             |
| msk             | OTHER CLOSED FRACTURE OF TARSAL&METATARSAL BONES |
| msk             | CLOSED DISLOCATION OF OTHER SITE OF SHOULDER     |
| msk             | CLOSED FRACTURE OF OLECRANON PROCESS OF ULNA     |
| msk             | CLOSED FRACTURE OF LOWER END OF RADIUS WITH ULNA |
| msk             | GIANT CELL TUMOR OF TENDON SHEATH                |
| msk             | CLOSED DISLOCATION, STERNUM                      |
| msk             | OTHER SYMPTOMS REFERABLE TO SHOULDER JOINT       |
| msk             | CLOSED FRACTURE OF PATELLA                       |
| msk             | OPEN DISLOCATION OF OTHER PART OF FOOT           |
| msk             | NONUNION OF FRACTURE                             |
| msk             | CLOSED FRACTURE OF SHAFT OF TIBIA                |
| msk             | EFFUSION OF LOWER LEG JOINT                      |
| msk             | EFFUSION OF JOINT, SITE UNSPECIFIED              |
| msk             | CLOSED FRACTURE OF UNSPECIFIED PART OF HUMERUS   |
| msk             | CLOSED FRACTURE OF TRIQUETRAL BONE OF WRIST      |
| msk             | LAXITY OF LIGAMENT                               |
| msk             | CLOSED FRACTURE OF UPPER END OF TIBIA            |
| msk             | CLOSED FRACTURE OF ASTRAGALUS                    |
| msk             | PATHOLOGIC FRACTURE OF NECK OF FEMUR             |
| msk             | STRESS FRACTURE OF OTHER BONE                    |
| msk             | LESION OF RADIAL NERVE                           |
| msk             | NONTRAUMATIC COMPARTMENT SYNDROME LOWER EXTREM   |
| msk             | SPRAIN AND STRAIN OF CALCANEOFIBULAR             |
| msk             | SACROILIITIS NOT ELSEWHERE CLASSIFIED            |
| msk             | CLOSED POSTERIOR DISLOCATION OF HUMERUS          |
| msk             | OTHER DISORDERS SYNOVIUM TENDON AND BURSA OTHER  |
| msk             | CLOSED DISLOCATION OF KNEE UNSPECIFIED PART      |
| msk             | POST-TRAUMATIC SEROMA                            |
| msk             | OTHER LESION OF MEDIAN NERVE                     |
| msk             | SPRAIN AND STRAIN OF SACROILIAC                  |
| msk             | UNSPECIFIED DISORDER OF SYNOVIUM TENDON&BURSA    |
| msk             | CLOSED DISLOCATION OF MIDTARSAL                  |

| Diagnosis group | Diagnosis                                        |
|-----------------|--------------------------------------------------|
| msk             | TRIGGER FINGER                                   |
| msk             | CLOSED FRACTURE OF SURGICAL NECK OF HUMERUS      |
| msk             | CLOSED FRACTURE OF ANATOMICAL NECK OF HUMERUS    |
| msk             | CLOSED FRACTURE OF LATERAL CONDYLE OF HUMERUS    |
| msk             | PERONEAL MUSCULAR ATROPHY                        |
| msk             | EFFUSION OF JOINT OTHER SPECIFIED SITE           |
| msk             | UNSPECIFIED ENTHESOPATHY OF ELBOW                |
| msk             | CLOSED BIMALLEOLAR FRACTURE                      |
| msk             | DISPLCMT INTERVERT DISC SITE UNS W/O MYELOPATHY  |
| msk             | UNSPECIFIED MONONEURITIS OF LOWER LIMB           |
| msk             | ACROMIOCLAVICULAR SPRAIN AND STRAIN              |
| msk             | CLOS FRACTURE MID/PROXIMAL PHALANX/PHALANG HAND  |
| msk             | COMPLETE RUPTURE OF ROTATOR CUFF                 |
| msk             | CLOSED FRACTURE OF SHAFT OF RADIUS WITH ULNA     |
| msk             | CLOSED FRACTURE OF SHAFT OF ULNA                 |
| msk             | EFFUSION OF FOREARM JOINT                        |
| msk             | CLOSED FRACTURE OF SHAFT OF HUMERUS              |
| msk             | CLOSED FRACTURE OF UNSPECIFIED PART OF FEMUR     |
| msk             | DEGEN LUMBAR/LUMBOSACRAL INTERVERTEBRAL DISC     |
| msk             | OPEN FRACTURE OF PATELLA                         |
| msk             | SPRAIN AND STRAIN OF DELTOID OF ANKLE            |
| msk             | CLOSED INFERIOR DISLOCATION OF HUMERUS           |
| msk             | UNSPECIFIED SITE SACROILIAC REGION SPRAIN&STRAIN |
| msk             | NONALLOPATHIC LESION OF UPPER EXTREMITIES NEC    |
| msk             | NONALLOPATHIC LESION OF CERVICAL REGION NEC      |
| msk             | STIFFNESS OF JOINT NEC ANKLE AND FOOT            |
| msk             | UNSPECIFIED JOINT DISORDER OTHER SPECIFIED SITE  |
| msk             | PAIN IN JOINT, MULTIPLE SITES                    |
| msk             | UNSPECIFIED INFLAMMATORY SPONDYLOPATHY           |
| msk             | MERALGIA PARESTHETICA                            |
| msk             | CLOSED TRIMALLEOLAR FRACTURE                     |
| msk             | CLOSED FRACTURE OF UPPER END OF FIBULA           |
| msk             | DISPLCMT THOR INTERVERT DISC WITHOUT MYELOPATHY  |
| msk             | OTHER CLOSED FRACTURES OF DISTAL END OF RADIUS   |
| msk             | HYPERMOBILITY SYNDROME                           |
| msk             | CLOSED DISLOCATION OF HIP UNSPECIFIED SITE       |
| msk             | SPRAIN AND STRAIN OF RADIOCARPAL OF WRIST        |
| msk             | MUSCULAR WASTING AND DISUSE ATROPHY NEC          |
| msk             | CLOSED FRACTURE OF HAMATE BONE OF WRIST          |
| msk             | SPRAIN AND STRAIN OF CARPAL OF WRIST             |
| msk             | OTH SPEC D/O ROTATOR CUFF SYND SHLDR&ALLIED D/O  |
| msk             | OTHER WRIST SPRAIN AND STRAIN                    |

| Diagnosis group | Diagnosis                                        |
|-----------------|--------------------------------------------------|
| msk             | SPRAIN AND STRAIN OF STERNOCLAVICULAR            |
| msk             | OTHER SPEC SITES SACROILIAC REGION SPRAIN&STRAIN |
| msk             | SUPRASPINATUS SPRAIN AND STRAIN                  |
| neoplasm        | NEOPLASM OF UNSPECIFIED NATURE SITE UNSPECIFIED  |
| neoplasm        | BENIGN NEOPLASM OF OTHER SPECIFIED SITES         |
| neoplasm        | NEOPLSM UNS NATR ENDOCRN GLND&OTH PART NERV SYS  |
| neoplasm        | BEN NEO PITUITARY GLAND&CRANIOPHARYNGEAL DUCT    |
| neoplasm        | NEOPLASM UNCERTAIN BHV CNCTV&OTH SOFT TISSUE     |
| neoplasm        | MALIGNANT NEOPLASM OF BRAIN UNSPECIFIED SITE     |
| neoplasm        | BENIGN NEOPLASM OF UNSPECIFIED SITE              |
| neoplasm        | NEOPLASM OF UNCERTAIN BEHAVIOR OF SKIN           |
| neoplasm        | MELANOMA OF SKIN, SITE UNSPECIFIED               |
| neoplasm        | MALIGNANT NEOPLASM OF THYROID GLAND              |
| neoplasm        | BENIGN NEOPLASM OF CHOROID                       |
| neoplasm        | BENIGN NEOPLASM OF BREAST                        |
| neoplasm        | NEOPLASM UNCERTAIN BHV OTH&UNSPEC ENDOCRN GLANDS |
| neoplasm        | BENIGN NEOPLASM OF CONJUNCTIVA                   |
| neoplasm        | OTH BEN NEOPLSM CNCTV&OTH SFT TISSUE UNSPEC SITE |
| neoplasm        | MALIG NEOPLASM CNCTV&OTH SOFT TISSUE SITE UNSPEC |
| neoplasm        | NEOPLASMS UNSPEC NATURE BONE SOFT TISSUE&SKIN    |
| neoplasm        | NEOPLASM UNSPEC NATURE OTHER SPEC SITES          |
| neoplasm        | MALIGNANT MELANOMA SKIN EYELID INCLUDING CANTHUS |
| neoplasm        | BENIGN NEOPLASM OF LONG BONES OF LOWER LIMB      |
| neoplasm        | NEOPLASM OF UNCERTAIN BEHAVIOR SITE UNSPECIFIED  |
| neoplasm        | BEN NEOPLASM BONE&ARTICLR CARTILAGE SITE UNSPEC  |
| neoplasm        | MALIG NEOPLASM BONE&ARTICLR CART SITE UNSPEC     |
| neoplasm        | LEIOMYOMA OF UTERUS, UNSPECIFIED                 |
| neoplasm        | NEOPLASM OF UNSPECIFIED NATURE OF BRAIN          |
| neoplasm        | MALIGNANT NEOPLASM OF CEREBELLUM NOS             |
| neoplasm        | BENIGN NEOPLASM OTHER&UNSPECIFIED PARTS MOUTH    |
| neoplasm        | BENIGN NEOPLASM OF COLON                         |
| neoplasm        | UNS LEUKEMIA W/O MENTION ACHIEVED REMISSION      |
| neoplasm        | ACUTE MYELOID LEUKEMIA IN REMISSION              |
| neoplasm        | MALIGNANT NEOPLASM OF MOUTH UNSPECIFIED SITE     |
| neoplasm        | ACUTE LEUKEMIA UNSPECIFIED CELL TYPE REMISSION   |
| neoplasm        | BENIGN NEOPLASM OF LIP                           |
| neoplasm        | NEOPLASMS UNSPECIFIED NATURE RETINA AND CHOROID  |
| neoplasm.hhist  | FAMILY HISTORY OF MALIGNANT NEOPLASM OVARY       |
| neoplasm.hhist  | FAMILY HISTORY OF MALIGNANT NEOPLASM OF BREAST   |
| neoplasm.hhist  | FAMILY HISTORY OF UNSPECIFIED MALIGNANT NEOPLASM |
| neoplasm.hhist  | FAMILY HISTORY OF OTHER MALIGNANT NEOPLASM       |
| neoplasm.hhist  | FM HX MALIGNANT NEOPLASM GASTROINTESTINAL TRACT  |

| Diagnosis group | Diagnosis                                        |
|-----------------|--------------------------------------------------|
| neuro           | ADD CHILDHOOD WITHOUT MENTION HYPERACTIVITY      |
| neuro           | TENSION HEADACHE                                 |
| neuro           | OTHER MALAISE AND FATIGUE                        |
| neuro           | HEADACHE                                         |
| neuro           | ADD OF CHILDHOOD WITH HYPERACTIVITY              |
| neuro           | MIGRAINE UNSP W/O INTRACT W/O STATUS MIGRAINOSUS |
| neuro           | UNSPECIFIED HYPERKINETIC SYNDROME OF CHILDHOOD   |
| neuro           | DIZZINESS AND GIDDINESS                          |
| neuro           | UNSPEC EPILEPSY WITHOUT MENTION INTRACT EPILEPSY |
| neuro           | OTHER CONVULSIONS, fits                          |
| neuro           | SYNCOPE AND COLLAPSE                             |
| neuro           | OTHER SPECIFIC DVLPMENTL LEARNING DIFFICULTIES   |
| neuro           | MEMORY LOSS                                      |
| neuro           | EPILEPTIC GRAND MAL STATUS                       |
| neuro           | OTHER VOICE AND RESONANCE DISORDERS              |
| neuro           | HYPERKINETIC SYNDROME OF CHILDHOOD               |
| neuro           | UNSPECIFIED VISUAL LOSS                          |
| neuro           | CLUSTER HEADACHE SYNDROME UNSPECIFIED            |
| neuro           | FUSSY INFANT                                     |
| neuro           | OTHER SPEECH DISTURBANCE                         |
| neuro           | VAR MIGRAINE NEC W/O INTRACT W/O STAT MIGRNOSUS  |
| neuro           | MIGRAINE W/AURA W/O INTRACT W/O STATUS MIGRNOSUS |
| neuro           | HALLUCINATIONS                                   |
| neuro           | OTHER ALTERATION OF CONSCIOUSNESS                |
| neuro           | EPISODIC CLUSTER HEADACHE                        |
| neuro           | MIGRAINE W/O AURA W/O INTRACT W/O STAT MIGRNOSUS |
| neuro           | CHILDHOOD ONSET FLUENCY DISORDER                 |
| neuro           | VOICE AND RESONANCE DISORDER UNSPECIFIED         |
| neuro           | DYSPHONIA                                        |
| neuro           | TENSION TYPE HEADACHE UNSPECIFIED                |
| neuro           | CHRONIC CLUSTER HEADACHE                         |
| neuro           | CHRONIC FATIGUE SYNDROME                         |
| neuro           | OTH MIGRAINE W/O INTRACT W/O STATUS MIGRAINOSUS  |
| neuro           | CHRONIC TENSION TYPE HEADACHE                    |
| neuro           | POST-TRAUMATIC HEADACHE UNSPECIFIED              |
| neuro           | OTHER COMPLICATED HEADACHE SYNDROME              |
| neuro           | EPISODIC TENSION TYPE HEADACHE                   |
| neuro.hhist     | FAMILY HISTORY OF OTHER NEUROLOGICAL DISEASES    |
| obg.hist        | PERSONAL HX OTH GENITAL SYSTEM&OBSTETRIC D/O     |
| obs             | OBSERVATION FOR UNSPECIFIED SUSPECTED CONDITION  |
| obs             | OBSERVATION&EVAL SPCT EXPOS OTH BIOLOGIC AGT     |
| ortho           | OTHER ORTHOPEDIC AFTERCARE                       |

| Diagnosis group    | Diagnosis                                        |
|--------------------|--------------------------------------------------|
| ortho              | ANKLE JOINT REPLACEMENT BY OTHER MEANS           |
| ortho              | AFTERCARE HEALING TRAUMATIC FRACTURE LEG UNSPEC  |
| ortho              | AFTERCARE HEALING TRAUMATIC FRACTURE LOWER LEG   |
| ortho              | HIP JOINT REPLACEMENT BY OTHER MEANS             |
| ortho              | KIDNEY REPLACED BY TRANSPLANT                    |
| ortho              | OTH AFTERCARE INVOLVING INTERNAL FIXATION DEVICE |
| ortho              | KNEE JOINT REPLACEMENT BY OTHER MEANS            |
| ortho              | AFTERCARE HEALING PATHOLOGIC FRACTURE LOWER LEG  |
| ortho              | AFTERCARE HEALING TRAUMATIC FRACTURE UPPER ARM   |
| ortho              | AFTERCARE HEALING TRAUMATIC FRACTURE ARM UNSPEC  |
| ortho              | AFTERCARE HEALING PATHOLOGIC FRACTURE ARM UNSPEC |
| peanut.allergy     | PERSONAL HISTORY OF ALLERGY TO PEANUTS           |
| penicillin.allergy | PERSONAL HISTORY OF ALLERGY TO PENICILLIN        |
| pneum.shot         | NEED PROPH VACCINATION AGAINST STREP PNEUMONE    |
| polio.shot         | NEED PROPH VACC&INOCULAT AGAINST POLIOMYEL       |
| post.surgical      | ENCOUNTER CHG/REMOVAL NONSURGICAL WOUND DRESSING |
| post.surgical      | AFTERCARE FOLLOW SURGERY MUSCULOSKEL SYSTEM NEC  |
| post.surgical      | OTHER POSTSURGICAL STATUS OTHER                  |
| post.surgical      | OTHER SPECIFIED AFTERCARE FOLLOWING SURGERY      |
| post.surgical      | ENCOUNTER FOR REMOVAL OF SUTURES                 |
| post.surgical      | ENCOUNTER CHANGE/REMOVAL SURGICAL WOUND DRESSING |
| post.surgical      | ENCOUNTER FOR ANTINEOPLASTIC CHEMOTHERAPY        |
| pregnancy          | PREGNANT STATE, INCIDENTAL                       |
| proph.chemo        | NEED FOR OTHER PROPHYLACTIC CHEMOTHERAPY         |
| proph.inmuno       | NEED FOR PROPHYLACTIC IMMUNOTHERAPY              |
| proph.screen       | NEED FOR OTHER SPEC PROPHYLACTIC OR TX MEASURE   |
| psyhc.hhist        | FAMILY HISTORY OF PSYCHIATRIC CONDITION          |
| rabies.contact     | CONTACT WITH OR EXPOSURE TO RABIES               |
| rabies.hshot       | NEED PROPH VACCINATION&INOCULAT AGAINST RABIES   |
| rape.obs           | OBSERVATION FOLLOWING ALLEGED RAPE OR SEDUCTION  |
| renal              | DYSURIA                                          |
| renal              | POLYURIA                                         |
| renal              | OTHER SYMPTOMS INVOLVING URINARY SYSTEM          |
| renal              | UNSPECIFIED URINARY INCONTINENCE                 |
| renal              | UNSPECIFIED PYELONEPHRITIS                       |
| renal              | URINARY FREQUENCY                                |
| renal              | HYDRONEPHROSIS                                   |
| renal              | URGE INCONTINENCE                                |
| renal              | CALCULUS OF KIDNEY                               |
| renal              | URETHRAL DISCHARGE                               |
| renal              | CALCULUS OF URETER                               |
| renal              | URGENCY OF URINATION                             |

| Diagnosis group   | Diagnosis                                        |
|-------------------|--------------------------------------------------|
| renal             | NOCTURNAL ENURESIS                               |
| renal             | OTHER URETERIC OBSTRUCTION                       |
| renal             | UNSPECIFIED RETENTION OF URINE                   |
| renal             | NOCTURIA                                         |
| renal             | OTHER ABNORMALITY OF URINATION                   |
| renal             | UNSPECIFIED DISORDER OF KIDNEY AND URETER        |
| renal             | RENAL COLIC                                      |
| renal             | NEPHRITIS&NEPHROPATHY W/OTH PATHOLOG KIDNEY LES  |
| rep.prescriptions | ISSUE OF REPEAT PRESCRIPTIONS                    |
| sex               | UNSPECIFIED VENEREAL DISEASE                     |
| skin              | DERMATOPHYTOSIS OF GROIN AND PERIANAL AREA       |
| skin              | OTHER ACNE                                       |
| skin              | BENIGN NEOPLASM OF SKIN SITE UNSPECIFIED         |
| skin              | OTHER ATOPIC DERMATITIS AND RELATED CONDITIONS   |
| skin              | RASH AND OTHER NONSPECIFIC SKIN ERUPTION         |
| skin              | OTHER SPECIFIED DISEASE OF HAIR&HAIR FOLLICLES   |
| skin              | OTHER SPECIFIED DISEASE OF SEBACEOUS GLANDS      |
| skin              | SEBACEOUS CYST                                   |
| skin              | CARBUNCLE AND FURUNCLE OF UNSPECIFIED SITE       |
| skin              | IMPETIGO                                         |
| skin              | ROSACEA                                          |
| skin              | UNSPEC LOCAL INFECTION SKIN&SUBCUTANEOUS TISSUE  |
| skin              | DYSHIDROSIS                                      |
| skin              | LOCALIZED SUPERFICIAL SWELLING MASS OR LUMP      |
| skin              | CELLULITIS AND ABSCESS OF FOOT EXCEPT TOES       |
| skin              | DERMATOPHYTOSIS OF FOOT                          |
| skin              | PLANTAR WART                                     |
| skin              | UNSPECIFIED DISORDER OF SKIN&SUBCUTANEOUS TISSUE |
| skin              | CELLULITIS AND ABSCESS OF LEG EXCEPT FOOT        |
| skin              | CELLULITIS AND ABSCESS OF UNSPECIFIED DIGIT      |
| skin              | CONTACT DERMATITIS&OTHER ECZEMA DUE TO SUNBURN   |
| skin              | DERMATOPHYTOSIS OF THE BODY                      |
| skin              | OTH SYMPTOMS INVOLVING SKIN&INTEG TISSUES        |
| skin              | BENIGN NEOPLASM SKIN OTHER&UNSPEC PARTS FACE     |
| skin              | CONTACT DERMATITIS&OTHER ECZEMA DUE UNSPEC CAUSE |
| skin              | UNSPECIFIED ALOPECIA                             |
| skin              | BEN NEOPLASM SKIN UPPER LIMB INCLUDING SHOULDER  |
| skin              | BENIGN NEOPLASM OF SCALP AND SKIN OF NECK        |
| skin              | OTHER SPECIFIED DISORDER OF SKIN                 |
| skin              | OTHER DYSCHROMIA                                 |
| skin              | PITYRIASIS ROSEA                                 |
| skin              | BENIGN NEOPLASM OF SKIN OF TRUNK EXCEPT SCROTUM  |

| Diagnosis group | Diagnosis                                        |
|-----------------|--------------------------------------------------|
| skin            | MOLLUSCUM CONTAGIOSUM                            |
| skin            | EDEMA                                            |
| skin            | UNSPECIFIED HYPERTROPHIC&ATROPHIC CONDITION SKIN |
| skin            | HIRSUTISM                                        |
| skin            | DYSCHROMIA, UNSPECIFIED                          |
| skin            | UNSPECIFIED SEBORRHEIC DERMATITIS                |
| skin            | CONDYLOMA ACUMINATUM                             |
| skin            | CELLULITIS AND ABSCESS OF UNSPECIFIED SITE       |
| skin            | ACQUIRED KERATODERMA                             |
| skin            | DERMATOPHYTOSIS OF NAIL                          |
| skin            | BENIGN NEOPLASM SKIN LOWER LIMB INCLUDING HIP    |
| skin            | SCAR CONDITION AND FIBROSIS OF SKIN              |
| skin            | UNSPECIFIED KERATOCONJUNCTIVITIS                 |
| skin            | PITYRIASIS VERSICOLOR                            |
| skin            | UNSPECIFIED DERMATOMYCOSIS                       |
| skin            | UNSPECIFIED KERATOCONUS                          |
| skin            | KELOID SCAR                                      |
| skin            | SEBORRHEA                                        |
| skin            | VITILIGO                                         |
| skin            | CONTACT DERMATITIS&OTHER ECZEMA DUE TO PLANTS    |
| skin            | OTHER SPECIFIED ERYTHEMATOUS CONDITION OTHER     |
| skin            | CELLULITIS&ABSCESS OF HAND EXCEPT FINGERS&THUMB  |
| skin            | TELOGEN EFFLUVIUM                                |
| skin            | PSORIATIC ARTHROPATHY                            |
| skin            | CELLULITIS AND ABSCESS OF UPPER ARM AND FOREARM  |
| skin            | SUNBURN OF SECOND DEGREE                         |
| skin            | LIPOMA OF OTHER SKIN AND SUBCUTANEOUS TISSUE     |
| skin            | OTHER PSORIASIS AND SIMILAR DISORDERS            |
| skin            | DISTURBANCE OF SKIN SENSATION                    |
| skin            | UNSPECIFIED CELLULITIS AND ABSCESS OF FINGER     |
| skin            | SCABIES                                          |
| skin            | STRIAE ATROPHICAE                                |
| skin            | CIRCUMSCRIBED SCLERODERMA                        |
| skin            | OTHER ALOPECIA                                   |
| skin            | CONTACT DERMATITIS&OTHER ECZEMA DUE OILS&GREASES |
| skin            | PYOGENIC GRANULOMA OF SKIN&SUBCUTANEOUS TISSUE   |
| skin            | CORNS AND CALLOSITIES                            |
| skin            | PRICKLY HEAT                                     |
| skin            | LUPUS ERYTHEMATOSUS                              |
| skin            | CELLULITIS AND ABSCESS OF BUTTOCK                |
| skin            | ERYSIPELAS                                       |
| skin            | LIPOMA OF UNSPECIFIED SITE                       |



| Diagnosis group | Diagnosis                                        |
|-----------------|--------------------------------------------------|
| skin            | ALOPECIA AREATA                                  |
| skin            | HIDRADENITIS                                     |
| skin            | DERMATOPHYTOSIS OF SCALP AND BEARD               |
| skin            | OTHER DERMATITIS DUE TO SOLAR RADIATION          |
| skin            | CARBUNCLE AND FURUNCLE OF FACE                   |
| skin            | PRIMARY FOCAL HYPERHIDROSIS                      |
| skin            | CONTACT DERMATITIS&OTHER ECZEMA DUE TO SOLVENTS  |
| skin            | ACNE VARIOLIFORMIS                               |
| skin            | UNSPECIFIED KERATITIS                            |
| skin            | CONTACT DERMATITIS&OTHER ECZEMA DUE DETERGENTS   |
| skin            | CONTACT DERMATITIS&OTH ECZEMA DUE OTH SPEC AGENT |
| skin            | OTHER SEBORRHEIC DERMATITIS                      |
| skin            | OTHER AND UNSPECIFIED PITYRIASIS                 |
| skin            | CARBUNCLE AND FURUNCLE OF OTHER SPECIFIED SITES  |
| skin            | FOX-FORDYCE DISEASE                              |
| skin            | CARBUNCLE AND FURUNCLE OF UPPER ARM AND FOREARM  |
| skin            | FLUSHING                                         |
| skin            | SPONTANEOUS ECCHYMOSES                           |
| skin            | CUTANEOUS ACTINOMYCOTIC INFECTION                |
| skin            | CARBUNCLE AND FURUNCLE OF BUTTOCK                |
| skin            | ACQUIRED ACANTHOSIS NIGRICANS                    |
| skin            | ONYCHIA AND PARONYCHIA OF TOE                    |
| skin            | ERYTHEMA MULTIFORME UNSPECIFIED                  |
| skin            | CNTC DERMATITIS&OTH ECZEMA DUE OTH CHEM PRODUCTS |
| skin            | UNSPECIFIED ERYTHEMATOUS CONDITION               |
| skin            | DERMATOPHYTOSIS OF OTHER SPECIFIED SITES         |
| skin            | DERMATOPHYTOSIS OF HAND                          |
| skin            | SEBORRHEA CAPITIS                                |
| skin            | DERMATITIS HERPETIFORMIS                         |
| skin            | PALLOR                                           |
| skin            | DERMATOPHYTOSIS OF UNSPECIFIED SITE              |
| skin            | PYODERMA GANGRENOSUM                             |
| skin            | BENIGN NEOPLASM OF SKIN OF LIP                   |
| skin            | BENIGN NEOPLASM OF EAR&EXTERNAL AUDITORY CANAL   |
| skin            | OTH SPEC LOCAL INFECTIONS SKIN&SUBCUT TISSUE     |
| skin            | ERYTHEMA NODOSUM                                 |
| skin            | OTHER SPEC HYPERTROPHIC&ATROPHIC CONDITION SKIN  |
| skin            | BENIGN NEOPLASM OF EYELID INCLUDING CANTHUS      |
| skin            | ERYTHEMA MULTIFORME MINOR                        |
| skin            | OTHER SPECIFIED DISORDER OF SWEAT GLANDS         |
| skin            | DERMATITIS DUE TO COSMETICS                      |
| skin            | UNSPECIFIED DERMATITIS DUE TO SUN                |

| Diagnosis group | Diagnosis                                        |
|-----------------|--------------------------------------------------|
| skin            | UNSPECIFIED BULLOUS DERMATOSIS                   |
| skin            | JAUNDICE UNSPECIFIED NOT OF NEWBORN              |
| skin.hhist      | FAMILY HISTORY OF SKIN CONDITIONS                |
| skin.hist       | PERSONAL HISTORY DISEASES SKIN&SUBCUT TISSUE     |
| sleep           | UNSPECIFIED SLEEP DISTURBANCE                    |
| sleep           | INSOMNIA UNSPECIFIED                             |
| sleep           | SLEEP DISTURBANCES                               |
| sleep           | INSOMNIA DUE TO MENTAL DISORDER                  |
| sleep           | UNSPECIFIED SLEEP APNEA                          |
| sleep           | HYPERSOMNIA UNSPECIFIED                          |
| sleep           | OTHER CIRCADIAN RHYTHM SLEEP DISORDER            |
| sleep           | OTHER SLEEP DISTURBANCES                         |
| sleep           | OBSTRUCTIVE SLEEP APNEA                          |
| sleep           | DISRUPTION 24 HOUR SLEEP WAKE CYCLE UNSPECIFIED  |
| sleep           | CIRCADIAN RHYTHM SLEEP DISORDER JET LAG TYPE     |
| sleep           | INSOMNIA WITH SLEEP APNEA UNSPECIFIED            |
| smallpox.shot   | NEED PROPH VACCINATION&INOCULAT AGAINST SMALLPOX |
| staph.aur.hist  | PERSONAL HX OF METHICILLIN RESIST STAPH AUREUS   |
| stroke.hhist    | FAMILY HISTORY OF STROKE                         |
| substance       | NONDEPENDENT ALCOHOL ABUSE UNSPEC PATTERN OF USE |
| substance       | UNSPECIFIED ALCOHOL-INDUCED MENTAL DISORDERS     |
| substance       | NONDEPEND ALCOHOL ABUSE EPISODIC PATTERN OF USE  |
| substance       | NONDEPENDENT TOBACCO USE DISORDER                |
| substance       | COMB DRUG DEPEND EXCLD OPIOID DRUG UNSPEC ABS    |
| substance       | DRUG WITHDRAWAL                                  |
| substance       | OTH&UNSPEC ALCOHOL DEPENDENCE UNSPEC DRUNKENNESS |
| substance       | OTH MIXED/UNSP NONDEP DRUG ABUSE UNSPEC PAT USE  |
| substance       | OPIOID TYPE DEPENDENCE IN REMISSION              |
| substance       | NONDEPEND CANNABIS ABUSE UNSPEC PATTERN OF USE   |
| substance       | CANNABIS DEPENDENCE, EPISODIC ABUSE              |
| substance       | OTHER&UNSPECIFIED ALCOHOL DEPENDENCE REMISSION   |
| substance       | ALCOHOL WITHDRAWAL                               |
| substance       | ACUT ALCOHOLIC INTOXICATION EPISODIC DRUNKENNESS |
| substance       | DRUG INDUCED SLEEP DISORDERS                     |
| substance       | CANNABIS DEPENDENCE UNSPECIFIED ABUSE            |
| substance       | ACUTE ALCOHOLIC INTOXICATION UNSPEC DRUNKENNESS  |
| substance       | IDIOSYNCRATIC ALCOHOL INTOXICATION               |
| substance       | OPIOID TYPE DEPENDENCE UNSPECIFIED ABUSE         |
| substance       | AMPHET&OTH PSYCHOSTIMULANT DEPENDENCE REMISSION  |
| substance       | NONDEP COCAINE ABUSE UNSPEC PATTERN OF USE       |
| substance       | DRUG-INDUCED PERSISTING AMNESTIC DISORDER        |
| substance       | CANNABIS DEPENDENCE, IN REMISSION                |

| Diagnosis group      | Diagnosis                                        |
|----------------------|--------------------------------------------------|
| substance            | NONDEP CANNABIS ABUSE EPISODIC PATTERN OF USE    |
| substance            | ALCOHOLISM COUNSELLING                           |
| substance            | DRUG-INDUCED MOOD DISORDER                       |
| substance            | AMPHET/RELATED DRUG ABUSE-EPISOD PATTERN OF USE  |
| substance.counseling | COUNSELING ON SUBSTANCE USE AND ABUSE            |
| tb.contact           | CONTACT WITH OR EXPOSURE TO TUBERCULOSIS         |
| tb.screen            | SCREENING EXAMINATION FOR PULMONARY TUBERCULOSIS |
| tb.shot              | NEED PROPH VACCINATION W/TUBERCULOSIS VACCINE    |
| tetanus.shot         | NEED PROPH VAC W/COMB DIPHTH-TETANUS-PERTUSS VAC |
| tetanus.shot         | NEED PROPHYLACTIC VACCINATION W/TETANUS-DIPHTH   |
| tetanus.shot         | NEED PROPH VACCINATION W/TETANUS TOXOID ALONE    |
| typhoid.shot         | NEED PROPH VACC W/TYPHOID-PARATYPHOID ALONE      |
| uns.diag             | PERSON W/FEARED COMPLAINT WHOM NO DX WAS MADE    |
| uns.diag             | UNSPECIFIED REASON FOR CONSULTATION              |
| uns.diag             | CONVALESCENCE FOLLOWING SURGERY                  |
| uns.diag             | OTHER REASONS FOR SEEKING CONSULTATION           |
| uns.shot             | NEED PROPH VACC&INOCULAT AGNST OTH SPEC DISEASE  |
| uns.shot             | NEED PROPH VACC&INOCULAT AGNST UNSPEC SINGLE DZ  |
| uns.shot             | NEED PROPH VACCINATION&INOCULAT OTH VIRAL DZ     |
| uns.shot             | NEED PROPH VACC AGAINST OTH SPEC VACC            |
| up.hypertension      | ELEVATED BP READING WITHOUT DX HYPERTENSION      |
| uri                  | UNSPECIFIED VIRAL INFECTION IN CCE & UNS SITE    |
| uri                  | ACUTE URIS OF UNSPECIFIED SITE                   |
| uri                  | UNSPECIFIED OTITIS MEDIA                         |
| uri                  | ACUTE PHARYNGITIS                                |
| uri                  | ACUTE TONSILLITIS                                |
| uri                  | COUGH                                            |
| uri                  | UNSPECIFIED CONJUNCTIVITIS                       |
| uri                  | UNSPECIFIED SINUSITIS                            |
| uri                  | OTHER DISEASES OF NASAL CAVITY AND SINUSES       |
| uri                  | UNSPECIFIED OTORRHEA                             |
| uri                  | UNSPECIFIED INFECTIVE OTITIS EXTERNA             |
| uri                  | DYSFUNCTION OF EUSTACHIAN TUBE                   |
| uri                  | INFLUENZA WITH OTHER RESPIRATORY MANIFESTATIONS  |
| uri                  | ACUTE LARYNGITIS, WITHOUT MENTION OF OBSTRUCTIO  |
| uri                  | STREPTOCOCCAL SORE THROAT                        |
| uri                  | UNSPECIFIED OTALGIA                              |
| uri                  | NONSUPPRATV OTITIS MEDIA NOT SPEC AS ACUT/CHRON  |
| uri                  | POSTNASAL DRIP                                   |
| uri                  | ACUTE SINUSITIS, UNSPECIFIED                     |
| uri                  | PERITONSILLAR ABSCESS                            |
| uri                  | UNSPECIFIED DISORDER OF EAR                      |

| Diagnosis group   | Diagnosis                                        |
|-------------------|--------------------------------------------------|
| uri               | OTHER DISEASES OF RESPIRATORY SYSTEM NEC         |
| uri               | OTHER CHRONIC DISEASE OF TONSILS AND ADENOIDS    |
| uri               | HYPERTROPHY OF TONSILS ALONE                     |
| uri               | EPISTAXIS                                        |
| uri               | THROAT PAIN                                      |
| uri               | OTHER DISEASES OF VOCAL CORDS                    |
| uri               | ACUT SUPPRATV OTITIS MEDIA W/SPONT RUP EARDRUM   |
| uri               | UNSPECIFIED TINNITUS                             |
| uri               | STREPTOCOCCUS INFECTION CCE & UNS SITE GROUP A   |
| uri               | UNSPECIFIED DISORDER OF EXTERNAL EAR             |
| uri               | ACUTE LARYNGITIS, WITH OBSTRUCTION               |
| uri               | HYPERTROPHY OF ADENOIDS ALONE                    |
| uri               | CHRONIC FRONTAL SINUSITIS                        |
| uri               | CHRONIC ETHMOIDAL SINUSITIS                      |
| uri               | ACUTE MAXILLARY SINUSITIS                        |
| uri               | ACUTE NASOPHARYNGITIS                            |
| uri               | UNSPECIFIED NOISE EFFECTS ON INNER EAR           |
| uri               | CHRONIC MAXILLARY SINUSITIS                      |
| uri               | ACUT SUPPRATV OTITIS MEDIA W/O SPONT RUP EARDRUM |
| uri               | INFLUENZA D/T ID 2009 H1N1 INFLUENZA VIRUS       |
| uri               | ACUTE SEROUS OTITIS MEDIA                        |
| uri               | OTHER&UNSPEC DISEASES UPPER RESPIRATORY TRACT    |
| uri               | HEMORRHAGE FROM THROAT                           |
| uri               | ACUTE URIS OF OTHER MULTIPLE SITES               |
| uri               | ACUTE FRONTAL SINUSITIS                          |
| uri               | OTHER ACUTE SINUSITIS                            |
| uri               | ACUTE ETHMOIDAL SINUSITIS                        |
| uri               | OTOGENIC PAIN                                    |
| urinary infection | URINARY TRACT INFECTION SITE NOT SPECIFIED       |
| urinary infection | HEMATURIA UNSPECIFIED                            |
| urinary infection | HEMATURIA                                        |
| urinary infection | GROSS HEMATURIA                                  |
| urinary infection | OTHER SPECIFIED DISORDERS OF URETHRA             |
| urinary infection | MICROSCOPIC HEMATURIA                            |
| urinary infection | URETHRAL DIVERTICULUM                            |
| varicella.shot    | NEED PROPH VACC&INOCULAT AGAINST VARICELLA       |
| venereal.carrier  | CARRIER/SUSPECTED CARRIER OTH VENEREAL DISEASES  |
| venereal.screen   | SCREENING EXAMINATION FOR VENEREAL DISEASE       |
| venereal.screen   | CONTACT WITH OR EXPOSURE TO VENEREAL DISEASES    |
| venereal.screen   | COUNSELING OTHER SEXUALLY TRANSMITTED DISEASES   |
| viral             | UNSPECIFIED VIRAL MENINGITIS                     |
| viral             | VARICELLA WITHOUT MENTION OF COMPLICATION        |

---

| <b>Diagnosis group</b> | Diagnosis                                     |
|------------------------|-----------------------------------------------|
| warts                  | UNSPECIFIED VIRAL WARTS                       |
| warts                  | OTHER SPECIFIED VIRAL WARTS                   |
| weight                 | OBESITY, UNSPECIFIED                          |
| weight                 | OVERWEIGHT                                    |
| yellowf.shot           | NEED PROPH VACC&INOCULAT AGAINST YELLOW FEVER |

---



**Table S2** Building characteristics

| <b>Variable</b>                               | <b>Freshmen</b> | <b>Upperclassmen</b> |
|-----------------------------------------------|-----------------|----------------------|
| <b>Construction year</b>                      |                 |                      |
| Median                                        | 1914            | 1932                 |
| SD                                            | 54              | 15                   |
| <b>Distance to central health clinic [ft]</b> |                 |                      |
| Minimum                                       | 263             | 314                  |
| Mean                                          | 1423            | 1872                 |
| Maximum                                       | 4346            | 5166                 |
| <b>GSF (ft<sup>2</sup>)</b>                   |                 |                      |
| Minimum                                       | 10343           | 142880               |
| Mean                                          | 34014           | 192395               |
| Maximum                                       | 68440           | 222582               |
| SD                                            | 17424           | 19251                |
| <b>Occupancy (# people)</b>                   |                 |                      |
| Minimum                                       | 28              | 276                  |
| Mean                                          | 102             | 400                  |
| Maximum                                       | 250             | 487                  |

Corresponding Author Name: Jose G. Cedeno LaurentManuscript Number: JESEE-19-3024.R1

## Reporting Checklist

This checklist is used to ensure good reporting standards and to improve the reproducibility of published results. **Please respond completely to all questions relevant to your manuscript.** For more information, please read the journal's Guide to Authors.

Check here to confirm that the following information is available in the Material & Methods section:

- the **exact sample size (*n*)** for each experimental group/condition, given as a number, not a range;
- a **description of the sample collection** allowing the reader to understand whether the samples represent **technical or biological replicates** (including how many animals, litters, culture, etc.);
- a **statement of how many times the experiment shown was replicated in the laboratory**;
- **definitions of statistical methods and measures**: (For small sample sizes ( $n < 5$ ) descriptive statistics are not appropriate, instead plot individual data points)
  - very common tests, such as *t*-test, simple  $\chi^2$  tests, Wilcoxon and Mann-Whitney tests, can be unambiguously identified by name only, but more complex techniques should be described in the methods section;
  - are tests one-sided or two-sided?
  - are there adjustments for multiple comparisons?
  - **statistical test results**, e.g., ***P* values**;
  - definition of '**center values**' as **median or mean**;
  - definition of **error bars as s.d. or s.e.m. or c.i.**

Please ensure that the answers to the following questions are reported **in the manuscript itself**. We encourage you to include a specific subsection in the methods section for statistics, reagents and animal models. Below, provide the page number or section and paragraph number.

### Statistics and general methods

1. How was the sample size chosen to ensure adequate power to detect a pre-specified effect size? (Give section/paragraph or page #)

For animal studies, include a statement about sample size estimate even if no statistical methods were used.

2. Describe inclusion/exclusion criteria if samples or animals were excluded from the analysis. Were the criteria pre-established? (Give section/paragraph or page #)

3. If a method of randomization was used to determine how samples/animals were allocated to experimental groups and processed, describe it. (Give section/paragraph or page #)

For animal studies, include a statement about randomization even if no randomization was used.

### Reported in section/paragraph or page #

|                                                                                                                                                     |
|-----------------------------------------------------------------------------------------------------------------------------------------------------|
| All students living on campus for academic years 2008-2012, were included in the analysis. Description in Methods section, paragraph1               |
| NA                                                                                                                                                  |
| Only full-time academic periods were considered for the analysis. Criteria was pre-established. Paragraph 2 under electronic health records section |
| Natural randomization of dorm assignment process is described in Methods section, study population subsection paragraph 1                           |
| NA                                                                                                                                                  |



|                                                                                                                                                                                      |                                                                                                                                                      |
|--------------------------------------------------------------------------------------------------------------------------------------------------------------------------------------|------------------------------------------------------------------------------------------------------------------------------------------------------|
| 4. If the investigator was blinded to the group allocation during the experiment and/or when assessing the outcome, state the extent of blinding. (Give section/paragraph or page #) | Investigator was blind to group assignment, but not during outcome assessment. Described in Methods section, study population subsection paragraph 1 |
| For animal studies, include a statement about blinding even if no blinding was done.                                                                                                 | NA                                                                                                                                                   |
| 5. For every figure, are statistical tests justified as appropriate?                                                                                                                 | Yes                                                                                                                                                  |
| Do the data meet the assumptions of the tests (e.g., normal distribution)?                                                                                                           | Count data met poisson distribution assumptions                                                                                                      |
| Is there an estimate of variation within each group of data?                                                                                                                         | yes                                                                                                                                                  |
| Is the variance similar between the groups that are being statistically compared? (Give section/paragraph or page #)                                                                 | F tests were done between groups and variance is similar. Description in Results section, student health and housing subsection paragraph 1          |

**Reagents**

6. Report the source of antibodies (vendor and catalog number)
7. Identify the source of cell lines and report if they were recently authenticated (e.g., by STR profiling) and tested for mycoplasma contamination

**Reported in section/paragraph or page #**

|                                                                                                                                                      |    |
|------------------------------------------------------------------------------------------------------------------------------------------------------|----|
| 6. Report the source of antibodies (vendor and catalog number)                                                                                       | NA |
| 7. Identify the source of cell lines and report if they were recently authenticated (e.g., by STR profiling) and tested for mycoplasma contamination | NA |

**Animal Models**

8. Report species, strain, sex and age of animals
9. For experiments involving live vertebrates, include a statement of compliance with ethical regulations and identify the committee(s) approving the experiments.

**Reported in section/paragraph or page #**

|                                                                                                                                                                    |    |
|--------------------------------------------------------------------------------------------------------------------------------------------------------------------|----|
| 8. Report species, strain, sex and age of animals                                                                                                                  | NA |
| 9. For experiments involving live vertebrates, include a statement of compliance with ethical regulations and identify the committee(s) approving the experiments. | NA |

10. We recommend consulting the ARRIVE guidelines ([PLoS Biol. 8\(6\), e1000412,2010](https://doi.org/10.1371/journal.pbio.1000412)) to ensure that other relevant aspects of animal studies are adequately reported.

**Human subjects****Reported in section/paragraph or page #**

11. Identify the committee(s) approving the study protocol.

NA

12. Include a statement confirming that informed consent was obtained from all subjects.

NA

13. For publication of patient photos, include a statement confirming that consent to publish was obtained.

NA

14. Report the clinical trial registration number (at [ClinicalTrials.gov](http://ClinicalTrials.gov) or equivalent).

Na

15. For phase II and III randomized controlled trials, please refer to the [CONSORT statement](#) and submit the CONSORT checklist with your submission.

16. For tumor marker prognostic studies, we recommend that you follow the [REMARK reporting guidelines](#).

**Data deposition****Reported in section/paragraph or page #**

17. Provide accession codes for deposited data.

Data deposition in a public repository is mandatory for:

- a. Protein, DNA and RNA sequences
- b. Macromolecular structures
- c. Crystallographic data for small molecules
- d. Microarray data

NA

Deposition is strongly recommended for many other datasets for which structured public repositories exist; more details on our data policy are available in the Guide to Authors. We encourage the provision of other source data in supplementary information or in unstructured repositories such as [Figshare](#) and [Dryad](#). We encourage publication of Data Descriptors (see [Scientific Data](#)) to maximize data reuse.

18. If computer code was used to generate results that are central to the paper's conclusions, include a statement in the Methods section under "**Code availability**" to indicate whether and how the code can be accessed. Include version information as necessary and any restrictions on availability.

NA
